1     **Neurodegenerative disease-associated protein aggregates are poor inducers**  
2                     **of the heat shock response in neuronal-like cells**

3     R. San Gil<sup>1,2,3</sup>, D. Cox,<sup>4</sup> L. McAlary<sup>1,2</sup>, T. Berg<sup>1,2</sup>, A. K. Walker<sup>3</sup>, J. J. Yerbury<sup>1,2</sup>, L. Ooi<sup>1,2</sup>,  
4     H. Ecroyd<sup>1,2\*</sup>

- 5             1. Illawarra Health and Medical Research Institute, Wollongong, New South Wales,  
6             Australia  
7             2. Molecular Horizons and School of Chemistry and Molecular Bioscience, University of  
8             Wollongong, Wollongong, NSW, Australia  
9             3. Neurodegeneration Pathobiology Laboratory, Queensland Brain Institute, University of  
10            Queensland, St Lucia, Queensland, Australia  
11            4. Bio21, University of Melbourne, Melbourne, Victoria, Australia  
12

13    \* Corresponding author Heath Ecroyd PH: (+61) 02 42213443, email: [heathe@uow.edu.au](mailto:heathe@uow.edu.au)

14

15

16 **Abstract**

17 Protein aggregation that results in the formation of inclusions is strongly correlated with  
18 neuronal death and is a pathological hallmark common to many neurodegenerative diseases,  
19 including amyotrophic lateral sclerosis (ALS) and Huntington's disease. Cells are thought to  
20 dramatically up-regulate the levels of heat shock proteins during periods of cellular stress via  
21 induction of the heat shock response (HSR). Heat shock proteins are well-characterised  
22 molecular chaperones that interact with aggregation-prone proteins to either stabilise, refold,  
23 or traffic protein for degradation. The reason why heat shock proteins are unable to maintain  
24 the solubility of particular proteins in neurodegenerative disease is unknown. We sought to  
25 determine whether neurodegenerative disease-associated protein aggregates can induce the  
26 HSR. Here, we generated a neuroblastoma cell line that expresses a fluorescent reporter  
27 under conditions of HSR induction, for example heat shock. Using these cells, we show that  
28 the HSR is not induced by exogenous treatment with aggregated forms of Parkinson's  
29 disease-associated  $\alpha$ -synuclein or the ALS-associated G93A mutant of superoxide  
30 dismutase-1 (SOD1<sup>G93A</sup>). Furthermore, flow cytometric analysis revealed that intracellular  
31 expression of SOD1<sup>G93A</sup> or a pathogenic form of polyQ-expanded huntingtin (Htt<sup>72Q</sup>), similarly,  
32 results in no or low induction of the HSR. In contrast, expression of a non-pathogenic but  
33 aggregation-prone form of firefly luciferase (Fluc) did induce an HSR in a significantly greater  
34 proportion of cells. Finally, we show that HSR induction is dependent on the intracellular levels  
35 of the aggregation-prone proteins, but the pathogenic proteins (SOD1<sup>G93A</sup> and Htt<sup>72Q</sup>) elicit a  
36 significantly lower HSR compared to the non-pathogenic proteins (Fluc). These results  
37 suggest that pathogenic proteins either evade detection or impair induction of the HSR in  
38 neuronal-like cells. Therefore, defective HSR induction may facilitate the initiation of protein  
39 aggregation leading to inclusion formation in neurodegenerative diseases.

## 40 **Introduction**

41 The formation of intracellular protein inclusions is a characteristic hallmark of  
42 neurodegenerative diseases, such as amyotrophic lateral sclerosis (ALS), Parkinson's  
43 disease (PD) and Huntington's disease (HD) (Chiti and Dobson 2017). In these diseases,  
44 proteins are either intrinsically disordered or partially unfold and self-associate through  
45 hydrophobic interactions between regions that are usually buried in the native conformation  
46 (Hipp, Kasturi et al. 2019). These inappropriate interactions nucleate the formation of protein  
47 aggregates that are the building blocks of protein inclusions (Kopito 2000). Inclusion formation  
48 has been strongly correlated with the death of neurons in neurodegenerative diseases (Braak,  
49 Del Tredici et al. 2003, Braak, Alafuzoff et al. 2006, Brettschneider, Del Tredici et al. 2013,  
50 Brettschneider, Arai et al. 2014). The progression of protein inclusion pathology from a focal  
51 site of onset to other regions of the central nervous system (CNS) may be driven by the  
52 movement of aggregated proteins in the extracellular space (Vaquer-Alicea and Diamond  
53 2019). Therefore, aggregation is seeded in neighbouring cells and neurons via prion-like  
54 propagation [for reviews see (Jucker and Walker 2013, Zeineddine and Yerbury 2015,  
55 Hanspal, Dobson et al. 2017, Victoria and Zurzolo 2017)]. These stages of disease onset and  
56 progression throughout the CNS suggest a widespread inability of cells to prevent the initial  
57 events leading to protein aggregation and the propagative seeding events that follow.

58 Cells have several mechanisms of defense against disturbances in protein homeostasis  
59 (proteostasis) (Yerbury, Ooi et al. 2016). These mechanisms usually function to ensure the  
60 correct folding, function, and turnover of proteins in the cell, and prevent the negative effects  
61 of proteostasis imbalance on cell viability. The heat shock response (HSR) is one such  
62 mechanism of proteostasis and acts as a first line of defense against protein destabilisation,  
63 misfolding, and aggregation (San Gil, Ooi et al. 2017). Increasing intracellular abundance of  
64 misfolded proteins can activate heat shock transcription factor 1 (HSF1), which translocates  
65 into the nucleus and binds heat shock elements (HSEs; pentameric sequence nGAAn where  
66 'n' is any nucleotide) in the promoter elements of its target genes (Pelham 1982, Sorger, Lewis

67 et al. 1987, Amin, Ananthan et al. 1988, Xiao and Lis 1988). Induction of the HSR results in  
68 rapid and dramatic upregulation of a family of proteins called heat shock proteins (Hsps),  
69 which are well-characterised molecular chaperones capable of stabilising and re-folding  
70 misfolded proteins, with additional functions in trafficking damaged proteins to proteasomal or  
71 autophagy-lysosome degradation pathways (Leak 2014). Heat shock proteins have previously  
72 been shown to interact with disease-associated mature aggregates *in vitro* (Cox, Whiten et al.  
73 2018, Wu, Vonk et al. 2019) and co-localise with pathogenic inclusions in brains of patients  
74 with neurodegenerative diseases (Watanabe, Dykes-Hoberg et al. 2001). Together, these  
75 findings suggest that Hsps act directly on misfolded proteins and increasing Hsp levels and  
76 their activity may be beneficial at both the early and late stages of the process of protein  
77 aggregation.

78 There is a wealth of evidence demonstrating that the over-expression of individual Hsps in  
79 cell-based and *in vivo* models significantly ameliorates neurodegenerative disease-associated  
80 protein aggregation (Bose and Cho 2017, San Gil, Ooi et al. 2017, Webster, Darling et al.  
81 2019). For example, over-expression of Hsp40 and Hsp27 results in a 90-95% decrease in  
82 insoluble protein in QBI-293 (human embryonic kidney) cells expressing an aggregation-  
83 prone, acetylation-mimicking mutant of ALS-associated TAR DNA-binding protein-43 (TDP-  
84 43) (Wang, Wander et al. 2017). Likewise, over-expression of HSF1 in a mutant superoxide  
85 dismutase-1 (SOD1) mouse model of ALS, led to a 34% decrease in the level of insoluble  
86 SOD1<sup>H46R/H48Q</sup> in spinal cord tissue compared to controls (Lin, Simon et al. 2013). The over-  
87 expression of constitutively active HSF1 in the R6/2 mouse model of HD led to a 79%  
88 reduction in the proportion of nuclei with inclusions and extended survival by 16 days (mean  
89 survival 122 days in R6/2-HSF1Tg compared to 102 days in R6/2 mice) (Fujimoto, Takaki et  
90 al. 2005). Therefore, activating the HSR and over-expressing Hsps in the CNS has promising  
91 therapeutic potential to ameliorate protein aggregation and extend survival in  
92 neurodegenerative diseases.

93 The activation of HSF1 may be differentially stimulated by misfolded proteins depending on  
94 whether they are sequestered into iPODs (Insoluble PrOtein Deposits), JUNQ (JUxtaNuclear  
95 Quality control), or other undefined sub-types of protein inclusions (Kaganovich, Kopito et al.  
96 2008). There is compelling evidence to suggest that HD-associated poly-glutamine expanded  
97 huntingtin is sequestered into iPODs, immobile inclusions for the storage of terminally  
98 aggregated proteins, that have little interaction with the proteostasis network (Kayatekin,  
99 Matlack et al. 2014, Polling, Mok et al. 2014). In contrast, it has been demonstrated that mutant  
100 SOD1 is partitioned into JUNQ compartments in which proteins are able to diffuse and are  
101 ubiquitinated, indicating a role for the ubiquitin-proteasome system (Matsumoto, Kim et al.  
102 2006, Polling, Mok et al. 2014, Farrarwell, Lambert-Smith et al. 2015). In addition to the sub-  
103 type of inclusion formed, the propensity of different neurodegenerative disease-associated  
104 proteins to undertake different off-folding pathways, *i.e.* amorphous or amyloid aggregation,  
105 may represent another factor that determines whether an HSR is induced.

106 The anti-aggregation and cytoprotective benefits of Hsps in cells cannot be realised if an HSR  
107 is not induced in neurons and glia in response to protein aggregation in neurodegenerative  
108 disease. The existence of intracellular inclusions and the cell-to-cell spread of aggregated  
109 proteins in neurodegenerative diseases led us to hypothesise that cells are not able to respond  
110 to protein aggregation by inducing the HSR. To evaluate this, we generated a stable cell line  
111 derived from mouse neuroblastoma, Neuro-2a, that express a fluorescent reporter under the  
112 control of a truncated *Hspa1a* promoter comprised of 8 putative HSEs. We then used this  
113 stable cell line to quantitatively assess the kinetics and magnitude of HSR induction after  
114 exogenous application of protein aggregates and intracellular inclusion formation. Moreover,  
115 we dissected the role of inclusion size, rate of formation, and intracellular protein concentration  
116 on HSR induction using these cells. We identified that whilst cells were able to activate the  
117 HSR in response to aggregation-prone non-pathogenic proteins, they failed to mount a  
118 significant HSR in response to the exogenous application or intracellular expression of  
119 pathogenic proteins. In addition, the intracellular levels of all aggregation-prone proteins tested

120 was the most significant determinant of HSR induction and demonstrated a positive correlation  
121 between protein concentration and proportion of cells with an activated HSR. The relatively  
122 poor induction of the HSR by pathogenic compared to non-pathogenic proteins could explain,  
123 at least in part, the ability of aggregates to evade molecular chaperones, form protein  
124 inclusions, and subsequently spread to other regions of the CNS in the context of  
125 neurodegenerative diseases.

126

## 127 **Materials and methods**

128 All reagents and chemicals used in this work were obtained from Merck-Sigma Aldrich (NSW,  
129 Australia) and Amresco (OH, USA) unless otherwise stated.

## 130 **Plasmids**

131 To generate cell lines that stably and constitutively express mCherry and stress-inducible  
132 EGFP downstream of a minimal Hsp70 promoter (minHsp70p) the following two constructs  
133 were generated; pCMV-mCherry and pminHsp70p-EGFP. With respect to pCMV-mCherry,  
134 the EGFP gene was excised from pEGFP-N1 (Takara Clontech, France) with flanking  
135 *EcoRI/BsrGI* sites and replaced with the mCherry gene. Regarding pminHsp70p-EGFP, a  
136 minimal Hsp70 promoter consisting of 8 putative heat shock elements (HSE; conserved  
137 pentameric sequence; nGAAn) upstream of an EGFP gene was excised with flanking  
138 *Acc651/BamHI* sites (kind gift of Dr Franck Couillaud, University of Bordeaux, France, and Dr  
139 Chrit Moonen, UMC Utrecht, The Netherlands) and subcloned into *Acc651/BamHI* digested  
140 pGL4.4 (Thermo Fisher Scientific, VIC, Australia) containing a hygromycin resistance gene.

141 The constructs coding for the expression of Cerulean-tagged huntingtin exon 1 fragment (Htt)  
142 with a non-pathogenic (i.e. 25 polyglutamines; pT-Rex-Cerulean-Htt<sup>25Q</sup>) or pathogenic (i.e. 72  
143 polyglutamines; pT-Rex-Cerulean-Htt<sup>72Q</sup>) poly-glutamine(Q) tracts were kind gifts from Prof  
144 Danny Hatters (University of Melbourne, VIC, Australia). Constructs for the expression of  
145 Cerulean-tagged SOD1<sup>WT</sup>, SOD1<sup>G93A</sup>, WT firefly luciferase (Fluc<sup>WT</sup>) and a double mutant

146 (R188Q/R261Q) form of Fluc (Fluc<sup>DM</sup>) were also generated. To do so, the *cerulean* gene was  
147 PCR amplified from pT-Rex-Htt<sup>72Q</sup> using forward: 5'-catggatccaccggctcgccaccatggtgagca-3'  
148 and reverse: 5'-caggattcttactgtacagctc-3' primers with flanking *Bam*HI/*Bsr*GI restriction sites  
149 to replace the EGFP gene in pEGFP-N1-SOD1<sup>WT</sup> and pEGFP-N1-SOD1<sup>G93A</sup>. The *cerulean*  
150 gene was PCR amplified from pT-Rex-Htt<sup>72Q</sup> using forward 5'-  
151 catgggatccaccggccggctcgccaccatggtgagca-3' and reverse: 5'-caggattcttactgtacagctc-3' primers  
152 with flanking *Bam*HI/*Bsr*GI restriction sites to replace the EGFP gene in pcDNA4-TO-myc-  
153 hisA-EGFP-Fluc<sup>WT</sup> and pcDNA4-TO-myc-hisA-EGFP-Fluc<sup>DM</sup> (these constructs were kind gifts  
154 of Prof Mark Wilson, University of Wollongong, NSW, Australia). All the constructs generated  
155 and used in this work were verified by sequencing using a Hitachi 3130xl Genetic Analyser  
156 (Applied Biosystems, MA, USA).

## 157 **Generation of SOD1<sup>G93A</sup> and $\alpha$ -synuclein aggregates**

### 158 ***Thioflavin T-based aggregation assays***

159 The formation of SOD1<sup>G93A</sup> aggregates was monitored by an *in situ* thioflavin T (ThT) binding  
160 assay that has previously been described (McAlary, Aquilina et al. 2016). Briefly, 100  $\mu$ M  
161 purified SOD1<sup>G93A</sup> was incubated with 20 mM DTT, 5 mM EDTA and 10  $\mu$ M ThT in PBS (pH  
162 7.4) at 37°C. The reaction mixtures were loaded into a clear-bottomed 384-well plate (Greiner,  
163 Germany). The plate was incubated in a PolarStar Omega Plate Reader (BMG  
164 Labtechnologies, VIC, Australia) at 37°C for 30 min prior to covering with adhesive film and  
165 commencing readings of samples. The plate underwent double orbital shaking at 300 rpm for  
166 300 s at the start of a 900 s cycle for at least 200 cycles. The ThT fluorescence was measured  
167 by excitation at 450 nm and its emission read at 480 nm using the bottom optic.

168 The formation of  $\alpha$ -synuclein fibrils was determined by an end-point ThT assay as previously  
169 described (Buell, Galvagnion et al. 2014). Briefly,  $\alpha$ -synuclein seeds were produced by  
170 incubating 150  $\mu$ M  $\alpha$ -synuclein in 50 mM phosphate buffer (pH 7.4), for 48 h at 40°C under  
171 maximal stirring with a magnetic stirrer (WiseStir MSH-20A, Witeg, Germany). The seed fibrils

172 were fragmented by sonication using a microtip probe sonicator (Branson 250 Digital Sonifer,  
173 Branson Ultrasonics, CT, USA), using 30% amplification and 3 cycles of 10 s pulses. The  
174 fibrils were flash frozen in liquid nitrogen and stored at -80°C until required. To produce mature  
175 fibrils, 100 µM of monomeric α-synuclein was incubated with 1% (w/w) α-synuclein seeds in  
176 50 mM phosphate buffer (pH 7.4) at 37°C for 72 h. A 5 µL aliquot of the α-synuclein fibrils was  
177 then loaded into a black clear-bottomed 384-well plate with 25 µL 50 mM phosphate buffer  
178 containing 10 µM ThT. The ThT fluorescence was measured by excitation at 450 nm and its  
179 emission read at 480 nm using the bottom optic.

### 180 ***Transmission electron microscopy of SOD1<sup>G93A</sup> and α-synuclein***

181 Transmission electron microscopy (TEM) was employed to visualise the recombinant  
182 SOD1<sup>G93A</sup> and α-synuclein aggregates. An 8 µL aliquot of the aggregated protein was applied  
183 onto an ultrathin carbon film coated 400 mesh copper TEM grid (ProSciTech, QLD, Australia).  
184 Samples were then diluted with 2 µL of 0.22 µm filtered milli-Q H<sub>2</sub>O and left for 3 min. Grids  
185 were dried with lint-free paper by wicking away the H<sub>2</sub>O from the side. Grids were washed with  
186 10 µL of milli-Q H<sub>2</sub>O, dried again, and 10 µL of 1% (w/v) phosphotungstic acid, the contrast  
187 reagent, was added and grids left to incubate for 1 min. The phosphotungstic acid was wicked  
188 away and the grids were washed twice with 10 µL of milli-Q H<sub>2</sub>O. Grids were air dried and  
189 imaged at the Australian Institute of Innovative Materials (University of Wollongong) using a  
190 JEM-2011 TEM (JEOL, Japan). Images were processed using Digital Micrograph (Gatan, CA,  
191 USA).

### 192 **Cell culture of Neuro-2a**

193 The murine neuroblastoma cell line, Neuro-2a, was obtained from the American Type Culture  
194 Collection (VA, USA). All cell lines were cultured in DMEM/F-12 supplemented with 2.5 mM  
195 L-glutamine and 10% (v/v) FCS (10% FCS-DMEM/F-12) at 37°C under 5% CO<sub>2</sub>/95% air in a  
196 Heracell 150i CO<sub>2</sub> incubator (Thermo Fisher Scientific). Cells were passaged every 2 days or  
197 once they had reached 80% confluency. The cells were tested for mycoplasma on receipt of



198 the cell line and quarterly thereafter using the MycoAlert Mycoplasma Detection Kit according  
199 to the manufacturer's instructions (Lonza, Basel, Switzerland).

## 200 **Generation and maintenance of Neuro-2a stable cells**

201 Stable cell lines for the constitutive expression of mCherry and stress-inducible expression of  
202 EGFP were generated in Neuro-2a cells. Thus, activation of the HSR (*i.e.* HSF1 binding to  
203 HSEs) after treatment with a stressor could be monitored in cells in real time using EGFP as  
204 a fluorescent reporter. Neuro-2a cells were used because they have a neuronal origin and  
205 high transfection and co-transfection efficiencies using standard lipid-based protocols.

206 Neuro-2a were first transfected with LTX Plus (Life Technologies, VIC, Australia; 1 µg DNA, 1  
207 µL PLUS reagent, and 3 µL Lipofectamine LTX per well) with *VspI* linearised pCMV-mCherry  
208 and grown under selective pressure (300 µg/mL G418) for 7 days. Monoclonal mCherry-  
209 expressing Neuro-2a cell lines were generated by limiting dilution and subsequent monoclonal  
210 expansion. Monoclonal mCherry-expressing Neuro-2a cell lines were transfected with *NotI*  
211 linearised pminHsp70p-EGFP and transfected cells were grown under selective pressure (300  
212 µg/mL G418 and 100 µg/mL hygromycin) for 7 days.

213 To obtain a polyclonal Neuro-2a cell population with stress-inducible EGFP expression, cells  
214 were heat shocked (42°C for 2 h with recovery at 37°C for 6 h), harvested by trypsinisation  
215 with 0.25% (w/v) trypsin-EDTA at 37°C for 5 min, washed twice in PBS, and resuspended in  
216 FACS buffer, 1 mM EDTA, 25 mM HEPES and 0.5% (w/v) BSA in PBS. These cells were then  
217 sorted using an S3e Cell Sorter (Bio-Rad Laboratories, NSW, Australia) equipped with 488  
218 nm and 561 nm lasers. Viable, single cells were resolved based on plots of forward scatter-  
219 area versus side scatter-area and forward scatter-area versus forward scatter-height.  
220 Subsequently, mCherry<sup>+ve</sup>/EGFP<sup>+ve</sup> cells were identified and sorted and maintained in  
221 complete medium supplemented with 1 × penicillin/streptomycin to prevent bacterial  
222 contamination. These EGFP HSR reporter cell lines are referred to in this work as Neuro-2a  
223 (HSE:EGFP), given EGFP expression is driven by HSF1 binding to HSEs.

224 Neuro-2a (HSE:EGFP) cells were maintained under the same conditions as the parental cell  
225 lines. Constant selection pressure was achieved by supplementing the media used to culture  
226 Neuro-2a (HSE:EGFP) with 300 µg/mL G418 and 100 µg/mL hygromycin.

## 227 **Cell stress treatments**

### 228 ***Heat shock, cadmium chloride (CdCl<sub>2</sub>), and celastrol treatment assays***

229 Heat shock, CdCl<sub>2</sub> and celastrol (AdooQ Biosciences, CA, USA) were used to assess the  
230 capacity of Neuro-2a cells to induce an HSR. Neuro-2a (HSE:EGFP) cells were seeded at a  
231 density of 200,000 cells/mL into 12-well plates. Optimal concentrations of CdCl<sub>2</sub> and celastrol  
232 were determined in concentration-response assays, whereby cells were either treated with  
233 CdCl<sub>2</sub> (0-33 µM) or celastrol (0 – 1 µM) for 24 h. In addition, cells were heat shocked (42°C  
234 for 2 h) and allowed to recover for different times at 37°C. After each treatment, Neuro-2a  
235 (HSE:EGFP) cells were imaged every 2 h for 24 h using an IncuCyte Live Cell Analysis System  
236 (Essen BioScience, MI, USA). The optimal treatment concentrations and times for induction  
237 of an HSR in these cells were determined to be 10 µM for 24 h for CdCl<sub>2</sub>, 0.75 µM for 24 h for  
238 celastrol and heat shock at 42°C for 2 h with recovery at 37°C for 24 h.

239 As a means of assessing magnitude and kinetics of HSR induction following each treatment,  
240 the maximum EGFP fluorescence intensity and time taken to reach half of the EGFP maximum  
241 intensity was analysed.

### 242 **Extracellular aggregation stress assays**

243 Pathogenic protein aggregates were applied extracellularly to Neuro-2a (HSE:EGFP) cells  
244 and activation of the HSR was assessed. Prior to treatment, soluble non-aggregated α-  
245 synuclein and SOD1<sup>G93A</sup> were centrifuged (14,000 × g for 30 min at 4°C) to remove any  
246 oligomeric seeds that may have spontaneously formed. Aggregated SOD1<sup>G93A</sup> was pelleted  
247 (14,000 × g for 30 min at 4°C) and resuspended in fresh PBS to eliminate possible cytotoxicity  
248 of DTT and EDTA in the assay.

249 Neuro-2a (HSE:EGFP) cells were seeded at a density of 100,000 cells/mL in a 96-well plate  
250 and cultured overnight in 10% FCS DMEM/F12. The following day, media was refreshed with  
251 serum free DMEM/F12 and cells were either treated with buffer alone (50 mM phosphate  
252 buffer for  $\alpha$ -synuclein or PBS for SOD1<sup>G93A</sup>), monomeric  $\alpha$ -synuclein or aggregated  $\alpha$ -  
253 synuclein (1  $\mu$ M and 10  $\mu$ M), or dimeric SOD1<sup>G93A</sup> or aggregated SOD1<sup>G93A</sup> (1  $\mu$ M and 10  $\mu$ M)  
254 diluted in serum-free DMEM/F12. Three wells in each plate were treated with 10  $\mu$ M CdCl<sub>2</sub> as  
255 a positive control for HSR induction. Cells were imaged every 2 h for 72 h in an IncuCyte Live  
256 Cell Analysis System (Essen BioScience).

### 257 **Intracellular protein aggregation stress assays**

258 Neuro-2a (HSE:EGFP) cells were transfected with Cerulean-tagged WT and aggregation-  
259 prone mutant proteins. Cells were seeded at a density of 100,000 cells/mL in 12-well plates  
260 and cultured in 1 mL of 10% FCS DMEM/F12 media overnight. Cells were transfected with  
261 DNA:lipid complexes (1  $\mu$ g DNA, 1  $\mu$ L PLUS reagent, and 3  $\mu$ L Lipofectamine LTX per well)  
262 for the expression of Cerulean-tagged SOD1<sup>WT</sup>, SOD1<sup>G93A</sup>, Htt<sup>25Q</sup>, Htt<sup>72Q</sup>, Fluc<sup>WT</sup>, or Fluc<sup>DM</sup>.

263 As controls, parental Neuro-2a were either untransfected, or singly transfected to express  
264 EGFP, mCherry or Cerulean fluorescent proteins. These samples were used to set gates for  
265 the flow cytometric analysis and to determine the spectral overlap that occurs between these  
266 three fluorophores so that spectral compensation could be applied prior to analysis. All  
267 analyses of the flow cytometry data were performed using FlowJo (version 10.0.8, Tree Star,  
268 OR, USA).

### 269 **IncuCyte Zoom imaging and image analysis**

#### 270 ***Image analysis of total image fluorescence intensity***

271 Time-lapse fluorescence intensity data from Neuro-2a (HSE:EGFP) cells were acquired using  
272 an IncuCyte Live Cell Analysis System. Phase contrast and fluorescent images were acquired  
273 at 2 h intervals with the 10 $\times$  or 20 $\times$  objective. The fluorescence intensity of mCherry and  
274 stress-inducible EGFP were quantified using the basic analyser algorithm (Table 1) from a

275 minimum of 9 images per well at each time point. Spectral overlap from the mCherry (3%)  
 276 channel was removed from the EGFP channel in these images.

277

278 **Table 1. Cell mask parameters for the analysis of relative fluorescence intensities of**  
 279 **EGFP and mCherry using the IncuCyte Zoom basic analyser.**

| Cell-line | Fluorescent protein | Channel | Exposure (ms) | Background correction              | Edge sensitivity | Data presentation                 |
|-----------|---------------------|---------|---------------|------------------------------------|------------------|-----------------------------------|
| Neuro-2a  | EGFP                | Green   | 400           | Top-hat (50 $\mu\text{m}$ , 2 GCU) | -15              | GCU $\times \mu\text{m}^2$ /image |
|           | mCherry             | Red     | 800           | Adaptive (2 RCU)                   | 0                | RCU $\times \mu\text{m}^2$ /image |

280

281 The mean EGFP relative fluorescence intensity (RFU) was normalised by dividing the EGFP  
 282 RFU by the mCherry RFU at each time point to account for relative changes in cell density  
 283 over time (equation 1). The normalised EGFP data is presented as the mean fold change ( $\Delta$ )  
 284 in the EGFP/ mCherry ratio ( $\pm$  S.E.M.) of three independent repeats as described by equation  
 285 2, where  $EGFP_{Tx}$  represents the EGFP RFU at any time and  $EGFP_{T0}$  represents the EGFP  
 286 RFU at 0 h.

287 
$$\left( \frac{EGFP(RFU)}{mCherry(RFU)} \right) = \text{Normalised EGFP} \quad (\text{equation 1})$$

288 
$$\left( \frac{\text{Normalised EGFP}_{Tx}}{\text{Normalised EGFP}_{T0}} \right) = \text{Fold } \Delta \text{ EGFP} \quad (\text{equation 2})$$

289 ***Image analysis of single cell fluorescent intensities***

290 Neuro-2a (HSE:EGFP) were either left untransfected or transfected to express Htt<sup>72Q</sup> or Fluc<sup>DM</sup>  
 291 in an 8-well Ibidi chamber, and imaged on a Leica SP5 confocal microscope at 37°C under  
 292 5% CO<sub>2</sub>/ 95% air. High-resolution images were captured using a 63  $\times$  water immersion  
 293 objective and widefield images were captured using a 40  $\times$  air objective (see Supplementary  
 294 Figure 4 for excitation and emission collection windows). Each well was imaged at 8 regions  
 295 of interest at 1 h intervals for up to 60 h. The images obtained were analysed using CellProfiler  
 296 2.2.0 (Carpenter, Jones et al. 2006, Kametsky, Jones et al. 2011, McQuin, Goodman et al.  
 297 2018). The mask parameters used for the identification of “cells” and “inclusions” are outlined

298 in Table 2. These parameters were optimised to separate cell clumps and identify individual  
 299 cells and inclusions. Using these parameters, the following custom-made sequence of image  
 300 processing events was used to analyse all images in a non-biased manner; (i) all images were  
 301 converted to greyscale, (ii) “cells” were identified as primary objects (Table 2), (iii) “inclusions”  
 302 were identified as primary objects (Table 2), (iv) the region of the cell cytoplasm excluding the  
 303 inclusions was defined as “cells – inclusions” tertiary objects, (v) the Cerulean fluorescence  
 304 intensities of “cells” and EGFP fluorescence intensities of the regions defined as “cells –  
 305 inclusions” was measured. The tertiary objects identified, “cells – inclusions”, were applied to  
 306 eliminate the spectral overlap of the Cerulean fluorescence signal at the site of inclusions into  
 307 the EGFP fluorescence signal. In this way EGFP fluorescence was measured from an area of  
 308 the cell that did not contain inclusion bodies (i.e. “cells – inclusions”).

309 **Table 2. Mask parameters for the analysis of relative fluorescence intensities of**  
 310 **individual cells in confocal imaging experiments using Cell Profiler.**

| Object identified | Input image | Diameter (pixel units) | Threshold strategy | Thresholding method | Threshold boundaries | Distinguish clumps | Dividing lines in clumps |
|-------------------|-------------|------------------------|--------------------|---------------------|----------------------|--------------------|--------------------------|
| Nuclei            | Hoechst     | 20-100                 | Automatic          | -                   | -                    | Intensity          | Shape                    |
| Cells             | mCherry     | 20-65                  | Global             | Otsu                | 0.01-1.0             | Intensity          | Propagate                |
|                   | EGFP        | -                      | Global             | Otsu                | 0.0-1.0              | -                  | -                        |
| Inclusions        | Cerulean    | 15-40                  | Global             | Otsu                | 0.01-1.0             | Intensity          | Shape                    |

311 Bivariate plots of the Cerulean and EGFP fluorescence intensities derived from regions  
 312 defined as “cells – inclusions” demonstrated a strong correlation suggesting that the Cerulean  
 313 signal was still contributing to the EGFP signal (Supplementary Figure 4c). This spectral  
 314 overlap was calculated to be 13% based on EGFP- and Cerulean-only controls. Therefore,  
 315 spectral compensation was performed on the EGFP data according to equation 3.  
 316

$$317 \quad \text{Raw EGFP} - \left( \frac{\text{Raw Cerulean}}{1} \times \frac{13}{100} \right) = \text{Corrected EGFP} \quad (\text{equation 3})$$

318 Lastly, thresholding was used to count the number of Cerulean<sup>+ve</sup> (or transfected) cells or  
 319 EGFP<sup>+ve</sup> (or HSR<sup>+ve</sup>) cells at each time point. These thresholds were determined from the  
 320 EGFP RFU and Cerulean RFU of cells in the untransfected and untreated samples (in this  
 321 case 65 RFU and 15 RFU, respectively).

## 322 **Flow cytometric analysis**

### 323 ***Analysis of whole cells***

324 Flow cytometry was performed using an LSR Fortessa X-20 cell analyser equipped with 405  
325 nm, 488 nm, 561 nm and 640 nm lasers (BD Biosciences, CA, USA). A minimum of 20,000  
326 events per sample were collected at a high flow rate. Forward scatter was collected using a  
327 linear scale and side scatter in a log scale. Fluorescent emissions were collected as area (log  
328 scale), pulse height (log scale), and pulse width (linear scale) for each channel. For Cerulean  
329 fluorescence, data was collected with the 405 nm laser and 450/50 nm filter, EGFP was  
330 collected with the 488 nm laser and 525/50 nm filter, mCherry was collected with the 561 nm  
331 laser and 586/15 nm filter, and RedDot 1 was collected with the 640 nm laser and 670/30 nm  
332 filter. Spectral compensation, gating and data analysis of events acquired by flow cytometry  
333 was performed using Flow Jo software (Tree Star).

### 334 ***Flow cytometric analysis of inclusions and trafficking (FlolT)***

335 Cells to be analysed were grown and transfected in 24-well plates. Cells were washed twice  
336 with PBS (pH 7.4) 48 h post-transfection, harvested mechanically by aspiration on ice, and  
337 resuspended in 500  $\mu$ L ice-cold PBS for analysis of intact cells or cell lysates by flow  
338 cytometry. An aliquot of the cell suspension (150  $\mu$ L) was taken and the transfection efficiency  
339 determined using untransfected cells as a negative control sample. The remaining 350  $\mu$ L of  
340 cell suspension was lysed as described previously (Whiten, San Gil et al. 2016) in PBS  
341 containing a final concentration of 0.5% (v/v) TritonX-100 and 1  $\times$  Halt protease and  
342 phosphatase inhibitors. Except in control samples used to set gates, RedDot1 (Biotium, CA,  
343 USA) was diluted 1:1000 into lysis buffer prior to adding to cells. After 2 min incubation at  
344 room temperature to lyse cells, the lysate was analysed by flow cytometry measuring forward  
345 and side scatter, together with RedDot1 fluorescence. Analysis of all events was performed  
346 using Flow Jo (Tree Star). The number of inclusions in each sample was normalised to the

347 number of transfected nuclei the same sample and the transfection efficiency was determined  
348 from the whole-cell data.

## 349 **Statistics**

350 Results shown are the mean  $\pm$  S.E.M. of three independent experiments unless otherwise  
351 indicated. Evaluation of statistical differences between the means of groups was determined  
352 by a one-way analysis of variance (ANOVA) or two-way ANOVA for multiple comparisons.  
353 The F-statistic from the ANOVA test and its associated degrees of freedom (between groups  
354 and within groups, respectively) are reported in parentheses. The *P*-value from the ANOVA  
355 test is also stated. Post hoc testing for differences between means was done using Dunnett's  
356 when comparing means to the mean of the control, Tukey's for multiple comparisons of the  
357 means, or Bonferroni's for comparing the differences in the means between two samples over  
358 time, using GraphPad Prism 5 (GraphPad Software, Inc., CA, USA) and as described in the  
359 appropriate figure legends. For data showing the fold change in EGFP expression over time  
360 in Neuro-2a (HSE:EGFP) cells, a non-linear fit was applied [ $\log(\text{agonist})$  vs. response  
361 (Variable slope)] to the data. The time taken to reach half maximal EGFP intensity was  
362 determined by using the  $\log EC_{50}$  value as a measure of the kinetics of the HSR.

363

## 364 **Results**

### 365 *Generation and validation of an HSR reporter cell line*

366 To investigate the activation of the HSR, stable Neuro-2a cell lines were generated in which  
367 expression of a fluorescent protein (EGFP) was used to report on HSR induction. These cells  
368 also constitutively express mCherry to account for changes in cell number or general  
369 transcription rates over time with different treatment paradigms. To validate that this stable  
370 cell line reports on HSR induction, the cells were first treated with known inducers of the HSR,  
371 namely  $CdCl_2$ , heat shock, and celastrol (a compound identified in a drug screen as a potent  
372 inducer of the HSR) (Heemskerk, Tobin et al. 2002, Westerheide, Bosman et al. 2004). The



373 fluorescent reporter, EGFP, has a half-life of 27 h (Corish and Tyler-Smith 1999), therefore  
374 these experiments were performed over a time-frame that would facilitate the accumulation of  
375 EGFP after HSR induction in order to assess the magnitude of the HSR. Concentration-  
376 response experiments were conducted to determine the concentration of CdCl<sub>2</sub> (0-33 μM) and  
377 celastrol (0-1 μM) that induces a maximal HSR (Supplementary Figure 1). Based on these  
378 results, subsequent experiments used 10 μM CdCl<sub>2</sub> and 0.75 μM celastrol over a 24 h time-  
379 frame, which were the lowest concentrations that induced a maximal HSR in Neuro-2a  
380 (HSE:EGFP).

381 Following treatment with 10 μM CdCl<sub>2</sub>, heat shock (42°C for 2 h), or 0.75 μM celastrol, there  
382 was a time-dependent increase in EGFP fluorescence intensity in Neuro-2a (HSE:EGFP) cells  
383 (Figure 1a and b). Fluorescence was first detected 2-4 h following heat shock treatment of  
384 Neuro-2a (HSE:EGFP) cells (Figure 1b), and reached maximal response after 12 h. The time  
385 taken to induce the HSR and to reach maximum EGFP fluorescence varied between treatment  
386 types. The expression of EGFP was induced significantly faster after heat shock ( $5.1 \pm 0.2$  h)  
387 compared to treatment with CdCl<sub>2</sub> or celastrol ( $11 \pm 0.6$  h and  $8.3 \pm 1.5$  h, respectively; Figure  
388 1c) [ $F(2, 6) = 28.28$ ,  $P = 0.0009$ ] as measured by the time taken to reach half maximal  
389 fluorescence. Treatment with each of these classical inducers of the HSR resulted in a  
390 significant increase in the magnitude of EGFP expression in Neuro-2a (HSE:EGFP) cells  
391 compared to no treatment [ $F(3,8) = 4.265$ ,  $P = 0.0448$ ] (Figure 1d). However, there were no  
392 differences observed between the magnitude of HSR induction between treatment type in  
393 Neuro-2a (HSE:EGFP) cells as determined by the fold change in fluorescence intensity at 24  
394 h (Figure 1d). Beyond the 24 h time-frame of these experiments, cells treated with CdCl<sub>2</sub> or  
395 celastrol died as a consequence of the toxicity of these treatments. Heat shocked cells  
396 continued to grow and divide during the recovery period; EGFP fluorescence intensity peaked  
397 at 10 h.



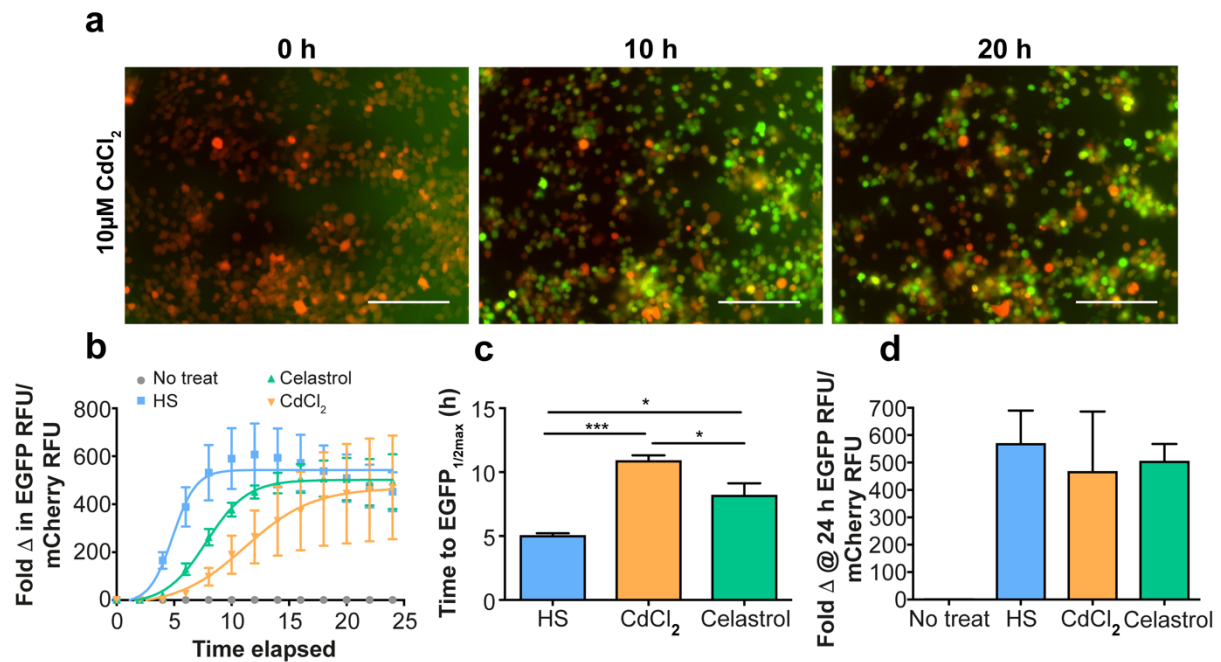

398

399 **Figure 1. Neuro-2a (HSE:EGFP) cells enable specific and sensitive quantification of HSR**  
400 **induction.** (a) Neuro-2a (HSE:EGFP) cells stably expressing mCherry were treated with 10 μM CdCl<sub>2</sub>  
401 and imaged every 2 h to monitor EGFP expression. Representative overlay images of mCherry and  
402 EGFP fluorescence are shown after 0, 10 and 20 h of treatment. Scale bars = 200 μm. (b) The fold  
403 change in EGFP fluorescence intensity over time normalised to mCherry fluorescence intensity to  
404 account for changes in cell density during the experiment. The HSR was induced in these cells by heat  
405 shock (42°C for 2 h) or treatment with 0.75 μM celastrol or 10 μM CdCl<sub>2</sub>. (c) The kinetics of HSR  
406 induction as determined by the time taken to reach half maximal EGFP fluorescence. (d) The magnitude  
407 of HSR induction as determined by EGFP fluorescence after 24 h of treatment with each stress. Data  
408 shown are the mean  $\pm$  S.E.M. of three independent repeats. Differences between the means were  
409 assessed using a one-way ANOVA followed by Tukey's post-hoc test, where  $P < 0.05$  (\*),  $P < 0.01$ (\*\*),  
410 and  $P < 0.001$  (\*\*\*)).

411

412 *Extracellular protein aggregates do not induce an HSR*

413 There is increasing evidence that disease-associated protein aggregation propagates through  
414 the CNS from the site of onset in a prion-like mechanism. This process likely involves the  
415 release of misfolded and aggregated protein from neurons into the extracellular space and  
416 their subsequent uptake by surrounding cells (Jucker and Walker 2013, Zeineddine,  
417 Pundavela et al. 2015, Zeineddine and Yerbury 2015). We therefore sought to determine  
418 whether cells respond to the extracellular application of aggregated protein by inducing an  
419 HSR. To test this, recombinant human  $\alpha$ -synuclein and SOD1<sup>G93A</sup> were aggregated *in vitro*.  
420 There was a significant increase in ThT fluorescence of the aggregated  $\alpha$ -synuclein sample

421 compared to monomeric  $\alpha$ -synuclein and buffer alone, indicative of an increase in  $\beta$ -sheet  
422 structure with aggregation (Figure 2a). Transmission electron microscopy (TEM) indicated that  
423 the  $\alpha$ -synuclein had formed long, mature fibrils  $> 2 \mu\text{m}$  in length (Figure 2a inset). The  
424 formation of SOD1<sup>G93A</sup> aggregates was monitored by an *in situ* ThT binding assay; there was  
425 a time-dependent increase in ThT fluorescence relative to buffer alone (Figure 2b). The  
426 SOD1<sup>G93A</sup> aggregates formed in these assays had an irregular amorphous structure and were  
427  $< 80 \text{ nm}$  in length (Figure 2b inset). Together, the ThT and TEM data indicate that the  
428 SOD1<sup>G93A</sup> aggregates formed in this study contain an underlying  $\beta$ -sheet structure, but did not  
429 assemble into highly-ordered fibrils.

430 Non-aggregated and aggregated forms of  $\alpha$ -synuclein and SOD1<sup>G93A</sup> were applied to Neuro-  
431 2a (HSE:EGFP) and the cells monitored for HSR induction by time-lapse live-cell imaging  
432 (Figure 2c-f). There was no significant difference in EGFP fluorescence in cells treated for 20  
433 h with either  $1 \mu\text{M}$  or  $10 \mu\text{M}$  of non-aggregated or aggregated  $\alpha$ -synuclein or SOD1<sup>G93A</sup> (Figure  
434 2e-f), and this remained the case even up to 72 h after treatment (data not shown). In contrast,  
435 the positive control CdCl<sub>2</sub> treatment induced an HSR in these cells (Figure 2e-f). Thus, these  
436 extracellular aggregates of  $\alpha$ -synuclein and SOD1<sup>G93A</sup> associated with neurodegenerative  
437 disease were not sufficient to induce an HSR in these cells.

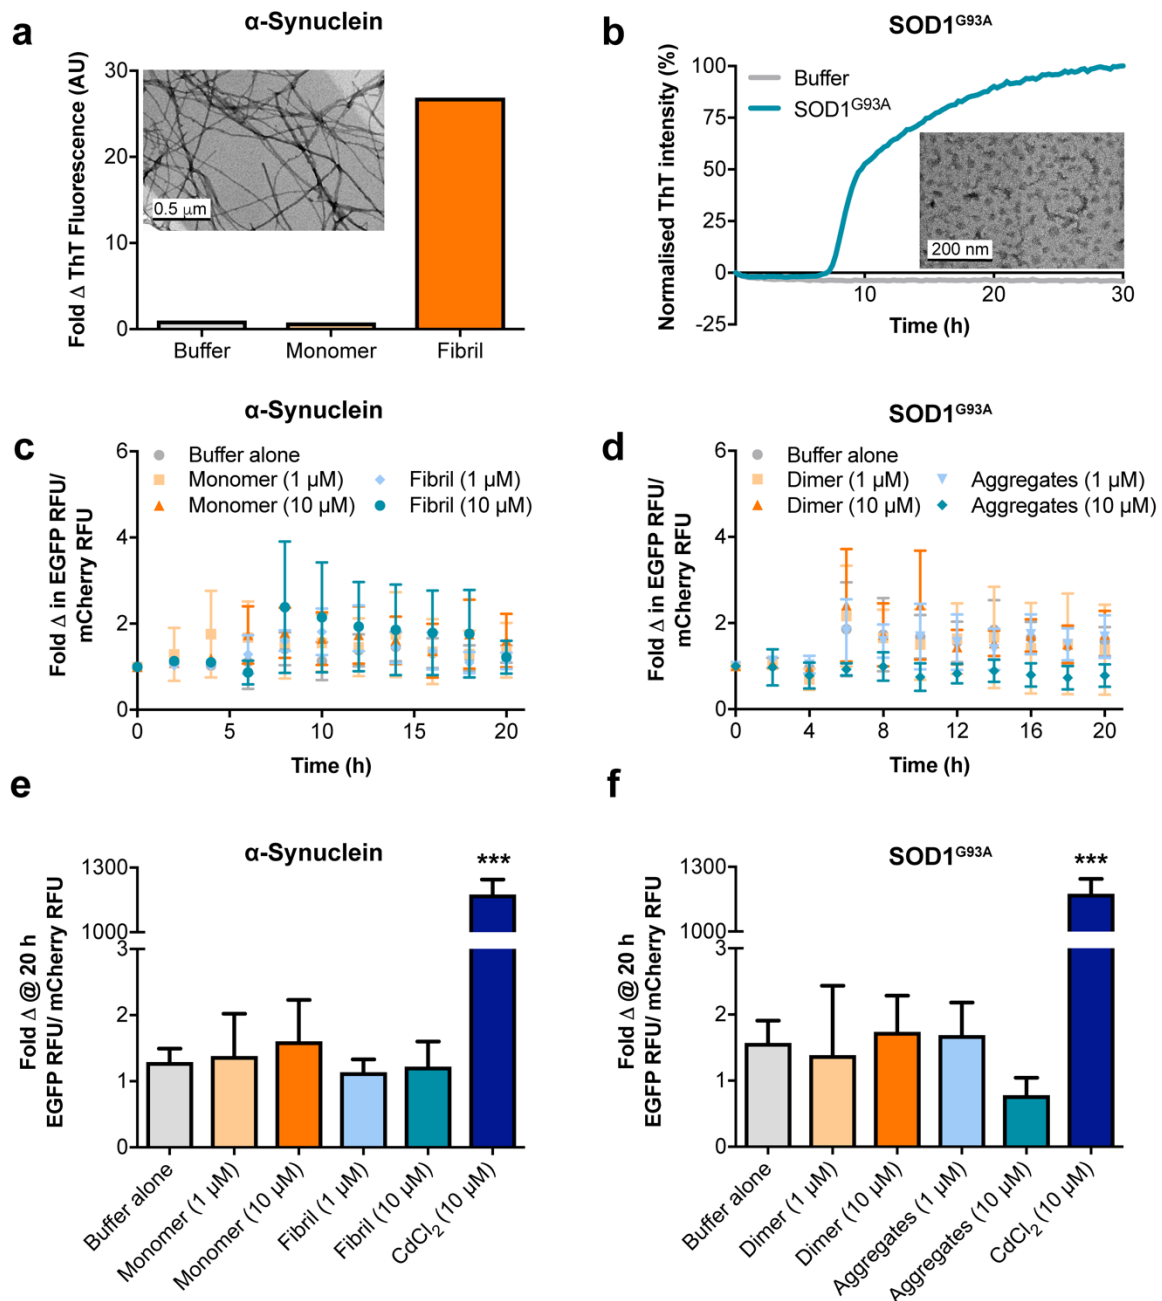

438

439 **Figure 2. Disease-associated protein aggregates do not induce an HSR in Neuro-2a**  
 440 **(HSE:EGFP) when applied extracellularly.** The formation of (a) α-synuclein fibrils, and (b)  
 441 SOD1<sup>G93A</sup> aggregates was confirmed by ThT fluorescence and TEM (insets) (scale bar = 500 and  
 442 200 nm, respectively). (c-d) Monitoring induction of the HSR using live-cell imaging. Time course  
 443 of EGFP RFU normalised to mCherry RFU of Neuro-2a (HSE:EGFP) cells treated with (c)  
 444 monomeric or fibrillar α-synuclein, or (d) dimeric or aggregated SOD1<sup>G93A</sup>. (e-f) The magnitude of  
 445 HSR activation as determined by the EGFP RFU/ mCherry RFU 20 h after application of the protein  
 446 aggregates or CdCl<sub>2</sub>. Data shown are the mean ± S.E.M. of at least three independent repeats.  
 447 Differences between the means were assessed using a one-way ANOVA followed by Dunnet's  
 448 post-hoc test (comparing to buffer alone control), where  $P < 0.001$  (\*\*\*)

449

450

451 *Intracellular aggregation of pathogenic proteins is a poor inducer of the HSR*

452 We next investigated whether the aggregation of proteins into inclusions in cells leads to the  
453 induction of an HSR in Neuro-2a (HSE:EGFP) cells. To examine this, a suite of constructs  
454 was generated for the expression of Cerulean-tagged SOD1<sup>WT</sup>, SOD1<sup>G93A</sup>, Htt<sup>25Q</sup>, Htt<sup>72Q</sup>,  
455 Fluc<sup>WT</sup>, or Fluc<sup>DM</sup>. These proteins were selected because they represent a mix of (i) pathogenic  
456 (SOD1 and Htt) and non-pathogenic (Fluc) aggregation-prone proteins and their WT isoforms,  
457 (ii) JUNQ-, iPOD-, and “other” inclusion forming proteins (SOD1, Htt, Fluc, respectively), and  
458 (iii) amyloidogenic (SOD1 and Htt) and amorphous (Fluc) proteins.

459 The propensity of each of these Cerulean-tagged proteins to aggregate was assessed by  
460 FloIT, a flow cytometric method for the quantification of inclusions (Whiten, San Gil et al.  
461 2016). The addition of RedDot1 to cell lysates enabled nuclei to be identified and enumerated  
462 (Figure 3a-b). Lysates from cells transfected to express SOD1<sup>WT</sup>, which does not readily form  
463 inclusions (McAlary, Aquilina et al. 2016, Whiten, San Gil et al. 2016), were used as a negative  
464 control for inclusion formation (Figure 3c). Cerulean-tagged SOD1<sup>G93A</sup> formed inclusions,  
465 which could be quantified (Figure 3d-e). The total number of inclusions formed by each over-  
466 expressed protein varied and was highest for Fluc<sup>WT</sup> and Fluc<sup>DM</sup>. Differences between the  
467 means were determined using a one-way ANOVA followed by Tukey’s post-hoc test and there  
468 were no statistically significant differences in the number of aggregates quantified in each  
469 sample.

470 One factor that could possibly influence HSR induction is the size and granularity of the  
471 inclusions formed by each protein, since this would be an indirect measure of the surface area  
472 available to interact with cytoplasmic proteins. FloIT analysis demonstrated that the SOD1<sup>WT</sup>  
473 and Htt<sup>25Q</sup> aggregates detected had a significantly greater granularity (SSC) compared to the  
474 other proteins tested ( $P < 0.01$ ). In addition, the relative size of the inclusions formed by Htt<sup>72Q</sup>  
475 were significantly larger (based on the forward scatter, FSC, signal, Figure 3f) compared to  
476 inclusions formed by Fluc<sup>DM</sup> and SOD1<sup>G93A</sup> [ $F(5, 8) = 8.027, P = 0.0056$ ].

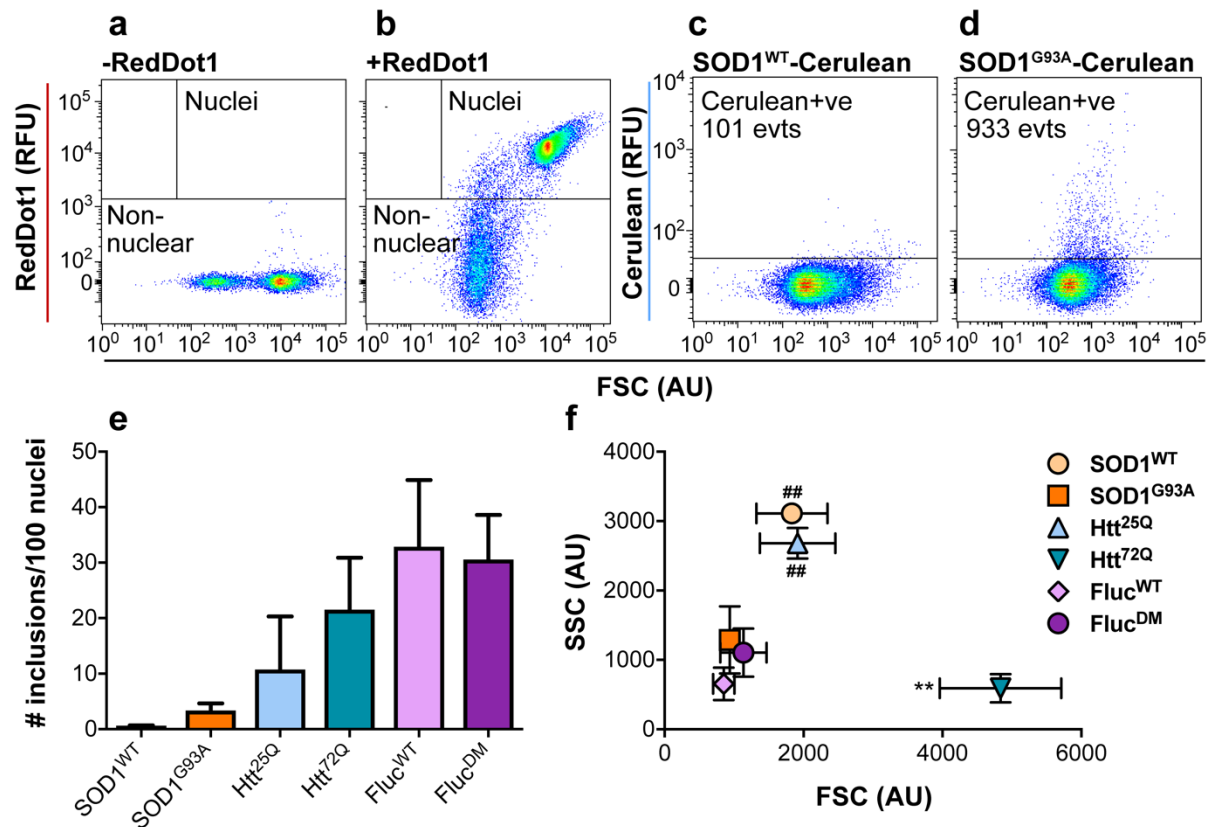

477

478 **Figure 3. Flow cytometric analysis of cell lysates (FloIT) demonstrates that different pathogenic**  
 479 **and non-pathogenic proteins form different quantities and sizes of inclusions in Neuro-2a**  
 480 **(HSE:EGFP) cells.** Neuro-2a (HSE:EGFP) cells were transfected to express Cerulean-tagged  
 481 SOD1<sup>WT</sup>, SOD1<sup>G93A</sup>, Htt<sup>25Q</sup>, Htt<sup>72Q</sup>, Fluc<sup>WT</sup>, or Fluc<sup>DM</sup> and, 48 h post-transfection, cells were lysed and  
 482 analysed by FloIT. (a)-(b) Plots of forward scatter (FSC; size) and RedDot1 nuclear dye fluorescence  
 483 used to enumerate the nuclei in the cell lysates. (a) Cells lysed in the absence of RedDot1 were used  
 484 to set square gates to capture RedDot1<sup>+ve</sup> events and RedDot1<sup>-ve</sup> non-nuclear events. (b) Cells lysed in  
 485 the presence of RedDot1 are shown as a representative plot. (c)-(d) Plots of FSC and Cerulean RFU.  
 486 Representative plots show events acquired from Neuro-2a (HSE:EGFP) cells transfected to express  
 487 SOD1<sup>WT</sup>-Cerulean and SOD1<sup>G93A</sup>-Cerulean. The number of Cerulean<sup>+ve</sup> events are denoted in the gate.  
 488 (e) The number of Cerulean<sup>+ve</sup> inclusion bodies quantified by FloIT, normalised to the number of  
 489 transfected nuclei (total number of nuclei divided by the transfection efficiency of whole cells). (f)  
 490 Bivariate plot of the FSC (size) and side scatter (SSC; granularity) of the Cerulean<sup>+ve</sup> inclusions  
 491 identified by FloIT. Data shown are the mean  $\pm$  S.E.M. of three independent repeats, some error bars  
 492 were small and can't be seen on the plot. Differences between the means were determined using a  
 493 one-way ANOVA followed by Tukey's post-hoc test, there were no statistically significant differences in  
 494 (e) and in (f) FSC,  $P < 0.01$  (\*\*) and SSC,  $P < 0.01$  (##).

495

496 Cells over-expressing these Cerulean-tagged proteins were also analysed by flow cytometry  
 497 to assess whether inclusion formation by aggregation-prone proteins induced an HSR in  
 498 Neuro-2a (HSE:EGFP) cells (Supplementary Figure 2). Untransfected cells were used as an  
 499 EGFP<sup>-ve</sup> control (Figure 4a) and cells treated with celastrol (0.75  $\mu$ M/ 24 h; Figure 4b) used as  
 500 an EGFP<sup>+ve</sup> control in these experiments. Representative flow cytometric data of the

501 proportion of EGFP<sup>+</sup> cells is shown for cells expressing Fluc<sup>DM</sup> in Figure 4c. Expression of  
502 the two pathogenic proteins, SOD1<sup>G93A</sup> or Htt<sup>72Q</sup>, resulted in  $1.6 \pm 0.4\%$  and  $4.0 \pm 1.1\%$  of the  
503 transfected cells becoming EGFP<sup>+</sup>, respectively (Figure 4d and Supplementary Figure 3).  
504 However, this was not significantly different than the proportion of EGFP<sup>+</sup> cells expressing  
505 non-aggregation prone isoforms of these proteins, i.e. SOD1<sup>WT</sup> or Htt<sup>25Q</sup>. In contrast, the  
506 expression of Fluc<sup>DM</sup> resulted in HSR induction in  $12.3 \pm 1.3\%$  of transfected cells, which was  
507 significantly greater than HSR induction in cells expressing the aggregation-prone disease-  
508 related proteins (Figure 4c-d).

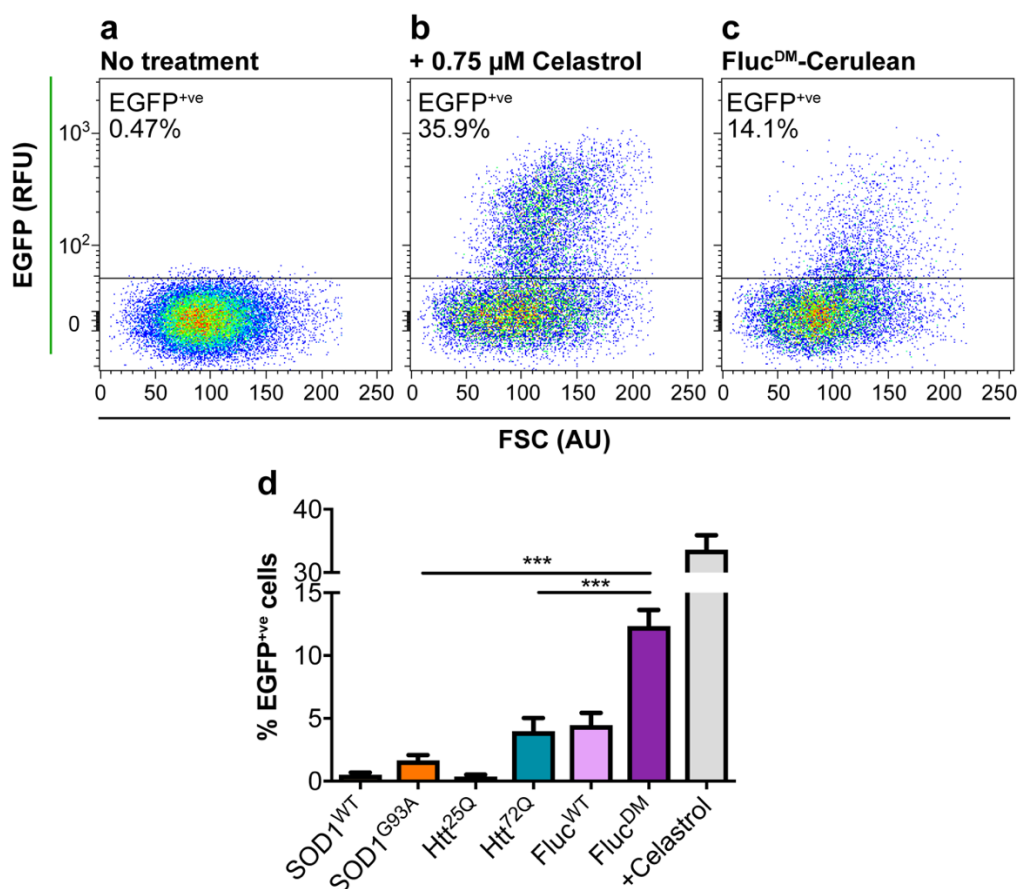

509  
510 **Figure 4. Over-expression of Fluc<sup>DM</sup>, but not disease-associated proteins, induces the**  
511 **HSR in Neuro-2a (HSE:EGFP) cells.** Neuro-2a (HSE:EGFP) cells were transfected to  
512 express Cerulean tagged SOD1<sup>WT</sup>, SOD1<sup>G93A</sup>, Htt<sup>25Q</sup>, Htt<sup>72Q</sup>, Fluc<sup>WT</sup> or Fluc<sup>DM</sup> proteins. After  
513 48 h incubation, cells were harvested for analysis by flow cytometry. Cellular debris, cell  
514 clumps, doublet events and untransfected cells were excluded from the analysis as described  
515 in Supplementary Figure 2. (a)-(c) Representative plots of FSC and EGFP fluorescence of (a)  
516 untransfected and untreated cells, (b) cells treated with 0.75  $\mu$ M celastrol (an inducer of the  
517 HSR), and (c) cells transfected to express Fluc<sup>DM</sup>-Cerulean. (d) The percent of transfected  
518 cells expressing Cerulean-tagged WT or mutant proteins which were EGFP<sup>+</sup>. Data shown  
519 are the mean  $\pm$  S.E.M. of three independent repeats. Statistically significant differences  
520 between the means were determined by one-way ANOVA and Tukey's multiple comparisons  
521 test, where  $P < 0.001$  (\*\*\*).



522 Given that the analysis of the entire cell population demonstrated that pathogenic SOD1 and  
523 Htt did not elicit a significant HSR compared to their respective WT proteins, we next sought  
524 to determine whether the expression level of an aggregation-prone protein affects the  
525 induction of the HSR in these cells. To do so, events from the flow cytometric analyses were  
526 binned according to the levels of Cerulean expression (5000 RFU per bin, where bin 1  
527 contains cells with the lowest expression and bin 10 the highest level of expression; Figure  
528 5a). For cells in each of these bins the proportion of cells in which an HSR was induced was  
529 determined. Representative bivariate plots of EGFP and FSC of cells transfected to express  
530 Htt<sup>72Q</sup> in Cerulean bins 5 and 10 are shown in Figure 5b. By binning the flow cytometry data  
531 in this way two factors can be assessed: (i) the effect of high and low protein concentration on  
532 induction of the HSR, and (ii) the induction of the HSR in cells expressing WT and mutant  
533 aggregation-prone proteins (Figure 5c-e).

534 In SOD1<sup>G93A</sup>-Cerulean expressing cells, as the amount of SOD1<sup>G93A</sup> expressed by cells  
535 increased so did the proportion of cells in which an HSR had been induced ( $0.4 \pm 0.2\%$  of  
536 cells were EGFP<sup>+ve</sup> in bin 1 compared to  $38.7 \pm 7.3\%$  of cells in bin 10; Figure 5c). This same  
537 trend was observed for cells expressing Htt<sup>72Q</sup>, Fluc<sup>WT</sup> and Fluc<sup>DM</sup>, *i.e.* cells expressing the  
538 highest amounts of these proteins (bin 10) had the highest proportion of EGFP<sup>+ve</sup> cells ( $23.4$   
539  $\pm 7.6\%$ ,  $37.1 \pm 15.9\%$ , and  $57.7 \pm 10\%$ , respectively; Figure 5d-e). In contrast, over-expression  
540 of non-aggregation prone isoforms of SOD1<sup>WT</sup> and Htt<sup>25Q</sup> did not induce an HSR in any  
541 cerulean bin demonstrating that it is not simply protein over-expression that induces an HSR.  
542 The HSR was most sensitive to increasing concentrations of Fluc<sup>DM</sup> and Fluc<sup>WT</sup>, for example  
543 in Cerulean bins 1 and 2, respectively, an EGFP<sup>+ve</sup> population was already evident.  
544 Comparatively, there is a significant increase in the proportion of EGFP<sup>+ve</sup> cells in bin 5 and  
545 bin 4 for Htt<sup>72Q</sup> and SOD1<sup>G93A</sup>, respectively, compared to WT controls. Together, these data  
546 show that an HSR is activated at lower relative levels of expression of Fluc<sup>WT</sup> and Fluc<sup>DM</sup>  
547 compared to Htt<sup>72Q</sup> and SOD<sup>G93A</sup>.

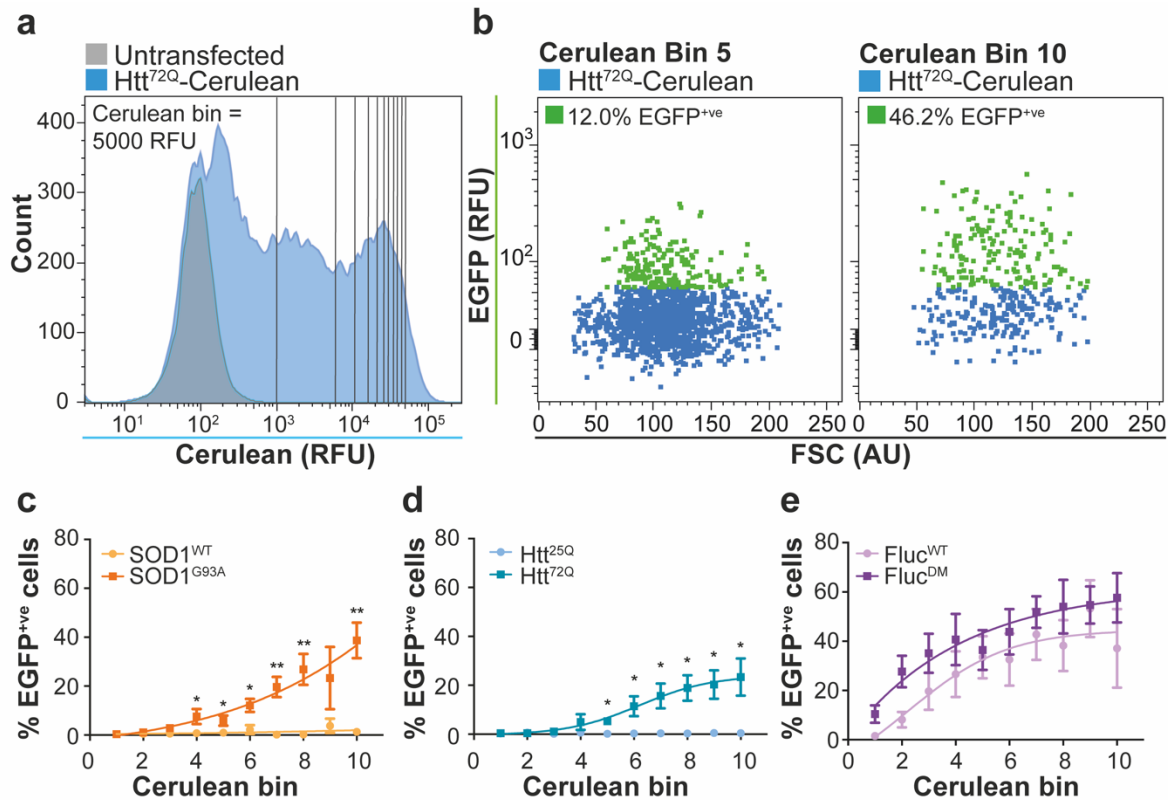

548

549 **Figure 5. High expression levels of aggregation-prone proteins correlate with an**  
 550 **increase in the proportion of cells with an activated HSR.** (a) Overlay histograms of  
 551 untransfected (*grey*) and Htt<sup>72Q</sup>-Cerulean (*blue*) transfected Neuro-2a (HSE:EGFP) with 10  
 552 Cerulean bins corresponding to 5000 AFU. (b) Representative plots of FSC and EGFP  
 553 fluorescence from cells transfected to express Htt<sup>72Q</sup>-Cerulean (bin 5, *left*; bin 10, *right*). The  
 554 EGFP<sup>+</sup> cells in the indicated Cerulean bin (*green*) are highlighted. (c)-(e) The percent of  
 555 EGFP<sup>+</sup> cells in each Cerulean bin for cells expressing (c) SOD1<sup>WT</sup> or SOD1<sup>G93A</sup>, (d) Htt<sup>25Q</sup> or  
 556 Htt<sup>72Q</sup>, or (e) Fluc<sup>WT</sup> or Fluc<sup>DM</sup>. Data shown are the mean ± S.E.M. of three independent  
 557 repeats. Differences between the means were determined using a two-way ANOVA followed  
 558 by Bonferroni's post hoc test, where  $P < 0.05$  (\*) and  $P < 0.01$  (\*\*).

559

560 *Formation of inclusions precedes the detection of HSR induction*

561 Finally, we sought investigate whether HSR activation occurs before or after inclusion  
 562 formation in cells to determine whether the HSR induction we observe is in response to protein  
 563 aggregation. We used Neuro-2a (HSE:EGFP) cells over-expressing Htt<sup>72Q</sup> or Fluc<sup>DM</sup> for these  
 564 experiments as both readily form inclusions yet have a differential capacity to induce an HSR  
 565 (Figure 3e and Figure 4d). This is exemplified by the proportion of EGFP<sup>+</sup> events in cells  
 566 expressing Htt<sup>72Q</sup> ( $4.0 \pm 1.1\%$ ) compared to Fluc<sup>DM</sup> ( $12.3 \pm 1.3\%$ ; Figure 4d). Live-cell time-  
 567 lapse confocal imaging of Neuro-2a (HSE:EGFP) cells facilitated the simultaneous tracking of  
 568 Htt<sup>72Q</sup> or Fluc<sup>DM</sup> expression, inclusion formation, and HSR induction in single cells (Figure 6).



569 There was no detectable HSR induction observed at any time point following transfection of  
570 cells with Htt<sup>72Q</sup> (Figure 6). However, in cells expressing Fluc<sup>DM</sup>, there was an increase in  
571 EGFP expression, indicative of HSR induction, in 2 of the 3 representative cells depicted in  
572 Figure 6 after 15 h of incubation (Figure 6).

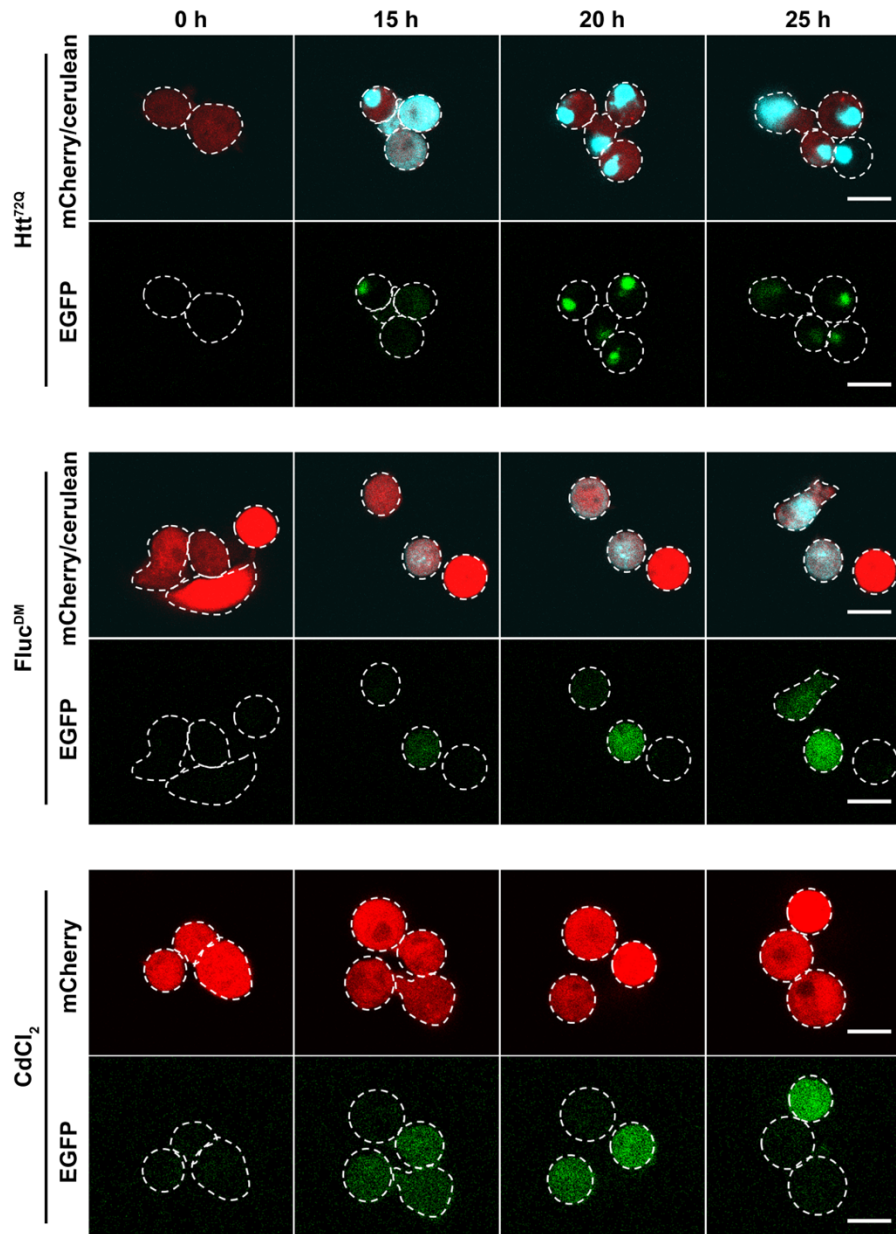

573

574 **Figure 6. The induction of the HSR and inclusion body formation captured by live cell**  
575 **imaging.** Neuro-2a (HSE:EGFP) cells were transfected to express Htt<sup>72Q</sup> (top panel) or Fluc<sup>DM</sup>  
576 (middle panel), or treated with 10  $\mu$ M CdCl<sub>2</sub> (bottom panel) and imaged every hour by confocal  
577 microscopy. Representative confocal images are shown after 0, 15, 20, and 25 h of treatment.  
578 Each image is overlaid by the cell outlines (white dotted line) as defined by the mCherry  
579 signal at each time point. Punctate EGFP signal represents spectral overlap from the Cerulean  
580 signal and diffuse EGFP signal represents the activation of the HSR. Scale bar = 20  $\mu$ m.  
581 Images are representative of three independent experiments.

582 We used a non-biased image quantification strategy to analyse wide-field of view images of  
583 treated or transfected cells over time to assess the proportion of HSR-positive cells. Due to  
584 the broad fluorescence emission spectrum of the Cerulean protein, spectral overlap was  
585 observed between the channels used to detect EGFP and Cerulean fluorescence, particularly  
586 in regions containing inclusions (Supplementary Figure 4a). To minimise spectral overlap,  
587 narrow emission windows for detection of Cerulean and EGFP fluorescence were used when  
588 imaging (462-492 nm and 506-563 nm, respectively; Supplementary Figure 4a). Despite this,  
589 an apparent EGFP signal was observed in areas containing inclusions comprised of Cerulean-  
590 tagged proteins (areas of intense fluorescence; Supplementary Figure 4a inset; white  
591 arrowheads), as a result of Cerulean fluorescence being detected in the EGFP emission  
592 window. Thus, to accurately measure the level of EGFP over-time, “cells” and “inclusions”  
593 were identified based on their mCherry and Cerulean fluorescence, respectively, and EGFP  
594 fluorescence intensity was measured from an area in the cell defined as “cells – inclusions”  
595 (Supplementary Figure 4b).

596 Images from these live-cell imaging experiments were subjected to the analyses outlined in  
597 Supplementary Figure 4, to track the expression of Cerulean-tagged proteins, formation of  
598 inclusions, and induction of the HSR over time. Treatment of Neuro-2a (HSE:EGFP) with 10  
599  $\mu\text{M}$   $\text{CdCl}_2$  (the positive control) resulted in a time-dependent increase in the proportion of cells  
600 that were EGFP<sup>+ve</sup> compared to untreated cells (Figure 7a). Treatment with  $\text{CdCl}_2$  significantly  
601 increased the proportion of EGFP<sup>+ve</sup> cells compared to no treatment [F (1, 130) = 369.7,  $P <$   
602 0.0001], and this reached statistical significance 12 h after treatment. Likewise, there was a  
603 time-dependent increase in the proportion of cells with an active HSR in samples transfected  
604 to express Fluc<sup>DM</sup> (Figure 7b). In contrast, there was no or low effect of Htt<sup>72Q</sup> expression on  
605 the proportion of EGFP<sup>+ve</sup> cells over time, which indicates the relative lack of HSR induction in  
606 these cells (Figure 7b). There was a significantly greater proportion of EGFP<sup>+ve</sup> cells in  
607 samples expressing Fluc<sup>DM</sup> compared to Htt<sup>72Q</sup> [F (1, 144) = 33.43,  $P <$  0.0001]. Post-hoc  
608 analysis using Bonferroni’s test showed that this difference was statistically significant 21 h

609 following transfection. Therefore, Fluc<sup>DM</sup> and Htt<sup>72Q</sup> have differential capacities to induce the  
610 HSR.

611 To determine whether this difference in HSR induction was associated with the aggregation  
612 rate of Fluc<sup>DM</sup> compared to Htt<sup>72Q</sup>, the proportion of cells with Htt<sup>72Q</sup> or Fluc<sup>DM</sup> inclusions was  
613 determined over the time-course of the live-cell imaging experiment (Figure 7c). There was a  
614 significant time-dependent increase in the number of inclusions formed in Neuro-2a  
615 (HSE:EGFP) by both Htt<sup>72Q</sup> and Fluc<sup>DM</sup>, with both samples reaching a plateau in the proportion  
616 of cells with inclusions after 20 h [F (12, 143) = 33.43,  $P < 0.0001$ ]. There was no effect of the  
617 type of protein expressed on the mean proportion of cells with inclusions formed over the time-  
618 course of the experiment [F (1, 143) = 0.09,  $P = 0.7607$ ]. Both Htt<sup>72Q</sup> and Fluc<sup>DM</sup> reached half  
619 maximal inclusion formation  $12.8 \pm 2.4$  h and  $13.9 \pm 3.4$  h following transfection, respectively,  
620 indicating that there was no significant difference in the rate of aggregation of either protein.  
621 In addition, the first Fluc<sup>DM</sup> inclusions are detected 10 h after transfection, whereas the first  
622 HSR-positive cells are detected 18 h after transfection (*i.e.* 8 hours later). This time delay from  
623 inclusion formation to HSR induction in cells expressing Fluc<sup>DM</sup> likely represents the time taken  
624 for HSF1 to activate, translocate to the nucleus, and drive transcription of the EGFP reporter  
625 to a level sufficient for detection by the confocal microscope. One of the limitations of time-  
626 lapse image analysis was the ability to detect inclusions of a range of sizes and fluorescence  
627 intensities. Consequently, it is likely that the reported maximum proportion of cells with  
628 inclusions (75% after 25 h for Fluc<sup>DM</sup> and Htt<sup>72Q</sup>) is an underestimate. Visual assessments of  
629 images confirmed that most transfected cells contained inclusions 36 h after transfection.

630

631

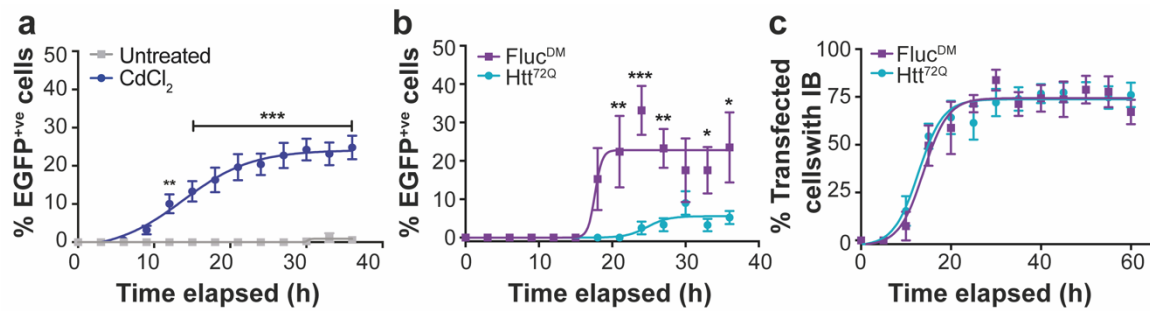

632

633 **Figure 7. The induction of the HSR in cells expressing Fluc<sup>DM</sup> or Htt<sup>72Q</sup> is not dictated**  
634 **by the rate of aggregate formation.** (a) The proportion of EGFP<sup>+</sup> cells over time after  
635 treatment (or not) with 10  $\mu$ M CdCl<sub>2</sub>. (b) The proportion of EGFP<sup>+</sup> cells over time after  
636 transfection to express Htt<sup>72Q</sup> or Fluc<sup>DM</sup>. (c) The percent of transfected cells with inclusions  
637 over time. Data shown are the mean  $\pm$  S.E.M. of single cell analyses of >300 transfected cells  
638 from 8 fields of view using a 40 $\times$  dry objective. These findings are representative of three  
639 independent live-cell imaging experiments. Differences in the means were assessed using a  
640 two-way ANOVA followed by post-hoc analysis using Bonferroni's test, where  $P < 0.05$  (\*),  $P$   
641  $< 0.01$  (\*\*), and  $P < 0.001$  (\*\*\*)).

642

## 643 Discussion

644 The HSR is widely recognised as a first line of defence against protein aggregation. However,  
645 an explanation as to why Hsps fail to suppress the formation of protein aggregates in  
646 neurodegenerative diseases is lacking. Therefore, we investigated whether inclusions are  
647 capable of inducing an HSR in a cell-line of neuronal origin. In this work, we provide strong  
648 evidence that extracellular and intracellular disease-associated protein aggregates are poor  
649 inducers of the HSR. Namely, using Neuro-2a (HSE:EGFP) cells, we showed that the  
650 extracellular application of pathogenic aggregates ( $\alpha$ -synuclein and SOD1<sup>G93A</sup>) does not  
651 induce an HSR. Over-expression of pathogenic proteins, Htt<sup>72Q</sup> and SOD1<sup>G93A</sup>, induced an  
652 HSR in a small but not significant proportion of cells, whereas the expression of the non-  
653 disease related Fluc<sup>DM</sup> induced an HSR in a significantly greater proportion of cells compared  
654 to SOD1<sup>G93A</sup> and Htt<sup>72Q</sup>. Moreover, we established that there is a positive relationship between  
655 the concentration of aggregation-prone proteins and induction of the HSR in cells, indicating  
656 that relatively higher intracellular concentrations of aggregation-prone proteins correlate with  
657 HSR induction. Our study provides evidence that disease-associated protein aggregates have  
658 limited capacity to induce an HSR. Therapeutic strategies that activate the HSR in order to

659 enhance levels of molecular chaperones, such as the Hsps, and restore proteostasis may  
660 therefore be of benefit in these disorders.

661 The cell-to-cell transfer of protein aggregates through the extracellular medium is thought to  
662 be one mechanism by which neurodegenerative diseases progress from a focal point of onset  
663 (Scheckel and Aguzzi 2018). Indeed, both SOD1 and  $\alpha$ -synuclein have been shown to act in  
664 a prion-like manner in various cell and animal models of disease [reviewed recently in (Leak,  
665 Frosch et al. 2019, McAlary, Plotkin et al. 2019)]. In the present study we showed that the  
666 extracellular application of SOD1<sup>G93A</sup> and  $\alpha$ -synuclein aggregates to Neuro-2a (HSE:EGFP)  
667 cells did not result in an induction of the HSR up to 72 h post-treatment. Previous studies have  
668 shown that treatment of other cell-types in this way elicits other stress-responses, such as  
669 inflammatory pathways. For example, treatment of EOC.13 microglial-like cells with SOD1<sup>G93A</sup>  
670 aggregates resulted in an upregulation of TNF $\alpha$  (Roberts, Zeineddine et al. 2013). The  
671 absence of an HSR in cells after treatment with protein aggregates suggests that these  
672 pathogenic proteins evade detection by the components of the HSR that activate this pathway.  
673 Thus, the failure of aggregated SOD1 and  $\alpha$ -synuclein to activate the HSR may contribute to  
674 disease progression in neurodegenerative diseases by enabling the seeding of inclusion  
675 formation in neighbouring cells that take up aggregates. Future research could investigate  
676 whether the pharmacological induction of the HSR prevents inclusion formation after seeding  
677 with aggregates, since this may be a therapeutic strategy to stop the progression of  
678 neurodegenerative diseases in the CNS. Indeed, a recent clinical trial has shown that the  
679 HSR-inducing compound, arimocloamol, is safe and potentially effective in patients with rapidly  
680 progressing SOD1-associated ALS (Benatar, Wu et al. 2018).

681 One possible explanation for the observed differences in HSR induction across the different  
682 proteins tested could be the intrinsic propensity of the proteins to form amorphous or amyloid  
683 inclusions, or alternatively iPOD or JUNQ formation. Here we showed that the intracellular  
684 expression of the pathogenic proteins, SOD1<sup>G93A</sup> and Htt<sup>72Q</sup>, resulted in a low proportion of  
685 cells (2-4% of transfected cells) that had induced an HSR 48 h after transfection. This suggests

686 that the HSR does not detect early protein misfolding and subsequent inclusion formation in  
687 the majority of SOD1<sup>G93A</sup> or Htt<sup>72Q</sup> expressing cells. In comparison, a significantly greater  
688 proportion of cells expressing Fluc<sup>DM</sup> induced an HSR. Interestingly, *in vitro*, mutant SOD1,  $\alpha$ -  
689 synuclein (Figure 2), and Htt (Scherzinger, Lurz et al. 1997) are  $\beta$ -sheet forming,  
690 amyloidogenic proteins, whereas Fluc forms amorphous aggregates (Gupta, Kasturi et al.  
691 2011). Therefore, perhaps the off-folding pathway (*i.e.* amorphous or amyloid aggregation),  
692 rather than the sub-type of inclusion (*i.e.* iPOD, JUNQ, or other), can explain the observed  
693 differences in HSR induction across the different proteins tested. This could be further  
694 examined by analysing a broader range of proteins that aggregate via amorphous and amyloid  
695 pathways.

696 Previous research using a HEK293 fluorescent reporter cell line suggested that expression of  
697 a pathogenic form of Htt, namely Htt<sup>91Q</sup>, did not lead to detectable induction of the HSR,  
698 irrespective of the expression level or aggregation status of the protein in the cell (Bersuker,  
699 Hipp et al. 2013). Likewise, over-expression of artificial  $\beta$ -sheet forming proteins in HEK293T  
700 cells did not induce the expression of Hsp110, Hsp70 or Hsp27, markers of HSR induction  
701 (Olzscha, Schermann et al. 2011). Moreover, the artificial  $\beta$ -sheet forming proteins  
702 significantly inhibited the induction of the HSR in MG132-treated HEK293 cells (monitored  
703 using a Fluc reporter downstream of the *Hspa1a* promoter) (Olzscha, Schermann et al. 2011).  
704 Taken together, these findings suggest a possible common underlying mechanism in  
705 neurodegenerative diseases, whereby disease-associated proteins evade or attenuate the  
706 HSR, which facilitates inclusion formation and propagation throughout the CNS. Future  
707 research that incorporates a range of wild-type and disease-causing, aggregation-prone  
708 proteins could establish whether this is a molecular pathology common to all  
709 neurodegenerative diseases.

710 We hypothesised that the rate of protein aggregation or the surface area of the inclusion  
711 exposed to the cytosol would play a significant role in inducing the HSR. Therefore, flow  
712 cytometry and live cell confocal imaging experiments were performed to assess whether the



713 capacity of cells to induce an HSR could be attributed to: (i) the rate of inclusion formation of  
714 the protein, (ii) the physical properties of the inclusions formed (i.e. size and granularity),  
715 and/or (iii) the intracellular concentration of the aggregation-prone protein. To our knowledge,  
716 this is the first study to report on the effects of aggregate size and rate of aggregate formation  
717 on the induction of the HSR. Since cells expressing Htt<sup>72Q</sup> exhibited lower HSR induction  
718 compared to Fluc<sup>DM</sup>, we hypothesised that the rate of inclusion formation could be a key  
719 determinant in induction of the HSR. Interestingly, there was no significant difference in the  
720 rate at which Htt<sup>72Q</sup> and Fluc<sup>DM</sup> formed inclusions. Thus, the rate of inclusion formation does  
721 not influence HSR induction in this cell-based model. Another factor possibly influencing HSR  
722 induction is the size and granularity of the inclusions formed by each protein, since this would  
723 be an indirect measure of the surface area available to interact with cytoplasmic proteins,  
724 including regulators of the HSR. The recent development of FloIT provided an avenue to  
725 assess this as it enables the size and granularity of inclusions to be determined (Whiten, San  
726 Gil et al. 2016). Interestingly, the SOD1<sup>WT</sup> and Htt<sup>25Q</sup> aggregates detected demonstrated  
727 significantly greater granularity compared to the other proteins tested. Fluc<sup>DM</sup> formed  
728 inclusions that were significantly smaller than those formed by Htt<sup>72Q</sup> but were similar in size  
729 those formed by SOD1<sup>G93A</sup>. Since SOD1<sup>G93A</sup> only induced an HSR in a low proportion of cells,  
730 these findings indicate that the size and granularity of the aggregate does not influence  
731 induction of the HSR in these cells.

732 High intracellular levels of proteins that exceed their predicted solubility is a key determinant  
733 of protein aggregation. This “supersaturation” concept is thought to be a significant factor  
734 driving protein aggregation in neurodegenerative diseases (Ciryam, Kundra et al. 2015).  
735 Indeed, proteins associated with ALS, such as TDP-43, FUS and SOD1 are supersaturated  
736 in the cell and, in their wild-type form, are susceptible to destabilisation and aggregation under  
737 conditions that drive proteostasis imbalance (Ciryam, Lambert-Smith et al. 2017). This  
738 instability is exacerbated by familial mutations in proteins linked to neurodegenerative  
739 diseases resulting in inherently aggregation-prone, supersaturated proteins in inherited

740 neurodegenerative diseases (Yerbury, Ooi et al. 2019). Using our Neuro-2a (HSE:EGFP) cells  
741 we determined whether increasing concentrations of aggregation-prone proteins (and thus  
742 their level of saturation) resulted in induction of the HSR. Our data show that there is a strong  
743 positive correlation between the amount of the aggregation-prone protein in cells (SOD1<sup>G93A</sup>,  
744 Htt<sup>72Q</sup>, Fluc<sup>DM</sup> and Fluc<sup>WT</sup>) and HSR induction. Significantly, this correlation was not observed  
745 for non-pathogenic forms of these disease-related proteins which are much less prone to  
746 aggregation (SOD1<sup>WT</sup> and Htt<sup>25Q</sup>). Thus, the levels of these proteins *per se* does not drive  
747 HSR induction; rather, it is the susceptibility of the protein to aggregation combined with high  
748 intracellular levels. Lower concentrations of Fluc<sup>DM</sup> and Fluc<sup>WT</sup> induced an HSR compared to  
749 Htt<sup>72Q</sup> and SOD1<sup>G93A</sup> and this could suggest that the form of aggregation (*i.e.* amorphous  
750 versus amyloidogenic) may also be an important factor in HSR induction. HSR was more  
751 sensitive to increasing levels of Fluc<sup>DM</sup> and Fluc<sup>WT</sup>, and/or the induction of the HSR was  
752 impaired/evaded by Htt<sup>72Q</sup> and SOD1<sup>G93A</sup> until a critical concentration was reached. These  
753 findings suggest that with increasing saturation of the protein there was an attempt by the cell  
754 to restore proteostasis after the accumulation of aggregation-prone proteins by inducing an  
755 HSR. Future research could work towards understanding whether the HSR is triggered in  
756 response to high concentrations of the soluble aggregation-prone protein or aggregated forms  
757 of protein.

758 In summary, this work shows that neurodegenerative disease-associated proteins are poor  
759 inducers of the HSR. Extracellular protein aggregates fail to induce the HSR in neuronal-like  
760 cells. Most remarkably, the intracellular expression of pathogenic aggregation-prone proteins  
761 also has a limited capacity to induce an HSR. Uniquely, we were able to determine the effect  
762 of a number of different factors pertaining to protein aggregates on HSR induction, including  
763 the aggregation propensity of pathogenic and non-pathogenic proteins, protein concentration  
764 within cells, number of inclusions formed, physical properties of the inclusions (size and  
765 granularity), and rate at which inclusions formed. Based on flow cytometric and live-cell  
766 imaging data it is concluded that HSR induction is dependent on the susceptibility of the



767 protein to aggregation and the levels of the aggregation-prone protein in cells. Induction of the  
768 HSR was not affected by the size of the inclusions nor the rate of inclusion formation. The  
769 limited capacity of disease-related protein aggregation to induce an HSR suggests that these  
770 evade detection by the pathway leading to activation of the HSR and/or impair the HSR,  
771 however, the mechanism by which this occurs is yet to be elucidated. Our work also suggests  
772 there is therapeutic potential in the development of approaches that activate the HSR, and  
773 hence increase the levels of stress-response proteins including molecular chaperones, in  
774 order to inhibit further protein aggregation and promote cell viability in the context of  
775 neurodegenerative diseases.

776

777 **Author contributions:** RSG and HE formulated the experimental approach. RSG performed  
778 all the experiments, analysed the data, constructed the figures and wrote the initial manuscript.  
779 DC and LM made the recombinant  $\alpha$ -synuclein and SOD1<sup>G93A</sup> protein and provided the  
780 protocols used for the *in vitro* aggregation of these proteins. RSG, DC, LM, AKW, JJY, LO,  
781 and HE edited the manuscript and approved the submission of the final manuscript.

782 **Acknowledgements:** This research performed by RSG has been conducted with the support  
783 of the Australian Government Research Training Program Scholarship. We would like to thank  
784 Dr David Mitchell from the Australian Institute of Innovative Materials (University of  
785 Wollongong Australia) for his help with transmission electron microscopy. We thank the  
786 Illawarra Health and Medical Research Institute for technical and administrative support.

787 **Conflict of interest:** The authors declare no conflict of interest.

788

789 **References:**

- 790 Amin, J., J. Ananthan and R. Voellmy (1988). "Key features of heat shock regulatory  
791 elements." Mol Cell Biol **8**: 3761-3769.
- 792 Benatar, M., J. Wu, P. M. Andersen, N. Atassi, W. David, M. Cudkovicz and D. Schoenfeld  
793 (2018). "Randomized, double-blind, placebo-controlled trial of arimoclomol in rapidly  
794 progressive SOD1 ALS." Neurology **90**: e565-e574.
- 795 Bersuker, K., M. S. Hipp, B. Calamini, R. I. Morimoto and R. R. Kopito (2013). "Heat shock  
796 response activation exacerbates inclusion body formation in a cellular model of Huntington  
797 disease." J Biol Chem **288**: 23633-23638.
- 798 Bose, S. and J. Cho (2017). "Targeting chaperones, heat shock factor-1, and unfolded protein  
799 response: Promising therapeutic approaches for neurodegenerative disorders." Ageing Res  
800 Rev **35**: 155-175.
- 801 Braak, H., I. Alafuzoff, T. Arzberger, H. Kretschmar and K. Del Tredici (2006). "Staging of  
802 Alzheimer disease-associated neurofibrillary pathology using paraffin sections and  
803 immunocytochemistry." Acta Neuropathol **112**: 389-404.
- 804 Braak, H., K. Del Tredici, U. Rub, R. A. de Vos, E. N. Jansen Steur and E. Braak (2003).  
805 "Staging of brain pathology related to sporadic Parkinson's disease." Neurobiol Aging **24**: 197-  
806 211.
- 807 Brettschneider, J., K. Arai, K. Del Tredici, J. B. Toledo, J. L. Robinson, E. B. Lee, S. Kuwabara,  
808 K. Shibuya, D. J. Irwin, L. Fang, V. M. Van Deerlin, L. Elman, L. McCluskey, A. C. Ludolph, V.  
809 M. Lee, H. Braak and J. Q. Trojanowski (2014). "TDP-43 pathology and neuronal loss in  
810 amyotrophic lateral sclerosis spinal cord." Acta Neuropathol **128**: 423-437.
- 811 Brettschneider, J., K. Del Tredici, J. B. Toledo, J. L. Robinson, D. J. Irwin, M. Grossman, E.  
812 Suh, V. M. Van Deerlin, E. M. Wood, Y. Baek, L. Kwong, E. B. Lee, L. Elman, L. McCluskey,  
813 L. Fang, S. Feldengut, A. C. Ludolph, V. M. Lee, H. Braak and J. Q. Trojanowski (2013).  
814 "Stages of pTDP-43 pathology in amyotrophic lateral sclerosis." Ann Neurol **74**: 20-38.
- 815 Buell, A. K., C. Galvagnion, R. Gaspar, E. Sparr, M. Vendruscolo and T. P. Knowles (2014).  
816 "Solution conditions determine the relative importance of nucleation and growth processes in  
817 alpha-synuclein aggregation." Proc Natl Acad Sci U S A **111**: 7671-7676.
- 818 Carpenter, A. E., T. R. Jones, M. R. Lamprecht, C. Clarke, I. H. Kang, O. Friman, D. A. Guertin,  
819 J. H. Chang, R. A. Lindquist, J. Moffat, P. Golland and D. M. Sabatini (2006). "CellProfiler:  
820 image analysis software for identifying and quantifying cell phenotypes." Genome Biol **7**:  
821 R100.
- 822 Chiti, F. and C. M. Dobson (2017). "Protein misfolding, amyloid formation, and human disease:  
823 A summary of progress over the last decade." Ann Rev Biochem **86**: 27-68.
- 824 Ciryam, P., R. Kundra, R. I. Morimoto, C. M. Dobson and M. Vendruscolo (2015).  
825 "Supersaturation is a major driving force for protein aggregation in neurodegenerative  
826 diseases." Trends Pharmacol Sci **36**: 72-77.
- 827 Ciryam, P., I. A. Lambert-Smith, D. M. Bean, R. Freer, F. Cid, G. G. Tartaglia, D. N. Saunders,  
828 M. R. Wilson, S. G. Oliver, R. I. Morimoto, C. M. Dobson, M. Vendruscolo, G. Favrin and J. J.  
829 Yerbury (2017). "Spinal motor neuron protein supersaturation patterns are associated with  
830 inclusion body formation in ALS." Proc Natl Acad Sci U S A **114**: E3935-E3943.

- 831 Corish, P. and C. Tyler-Smith (1999). "Attenuation of green fluorescent protein half-life in  
832 mammalian cells." Protein Eng **12**: 1035-1040.
- 833 Cox, D., D. R. Whiten, J. W. P. Brown, M. H. Horrocks, R. San Gil, C. M. Dobson, D.  
834 Klenerman, A. M. van Oijen and H. Ecroyd (2018). "The small heat shock protein Hsp27 binds  
835 alpha-synuclein fibrils, preventing elongation and cytotoxicity." J Biol Chem **293**: 4486-4497.
- 836 Farrarwell, N. E., I. A. Lambert-Smith, S. T. Warraich, I. P. Blair, D. N. Saunders, D. M. Hatters  
837 and J. J. Yerbury (2015). "Distinct partitioning of ALS associated TDP-43, FUS and SOD1  
838 mutants into cellular inclusions." Sci Rep **5**: 13416.
- 839 Fujimoto, M., E. Takaki, T. Hayashi, Y. Kitaura, Y. Tanaka, S. Inouye and A. Nakai (2005).  
840 "Active HSF1 significantly suppresses polyglutamine aggregate formation in cellular and  
841 mouse models." J Biol Chem **280**: 34908-34916.
- 842 Gupta, R., P. Kasturi, A. Bracher, C. Loew, M. Zheng, A. Villella, D. Garza, F. U. Hartl and S.  
843 Raychaudhuri (2011). "Firefly luciferase mutants as sensors of proteome stress." Nat.  
844 Methods **8**: 879-884.
- 845 Hanspal, M. A., C. M. Dobson, J. J. Yerbury and J. R. Kumita (2017). "The relevance of  
846 contact-independent cell-to-cell transfer of TDP-43 and SOD1 in amyotrophic lateral  
847 sclerosis." Biochim Biophys Acta **1863**: 2762-2771.
- 848 Heemskerck, J., A. J. Tobin and L. J. Bain (2002). "Teaching old drugs new tricks." Trends  
849 Neurosci **25**: 494-496.
- 850 Hipp, M. S., P. Kasturi and F. U. Hartl (2019). "The proteostasis network and its decline in  
851 ageing." Nat Rev Mol Cell Biol **20**: 421-435.
- 852 Jucker, M. and L. C. Walker (2013). "Self-propagation of pathogenic protein aggregates in  
853 neurodegenerative diseases." Nature **501**: 45-51.
- 854 Kaganovich, D., R. Kopito and J. Frydman (2008). "Misfolded proteins partition between two  
855 distinct quality control compartments." Nature **454**: 1088-1095.
- 856 Kamentsky, L., T. R. Jones, A. Fraser, M. A. Bray, D. J. Logan, K. L. Madden, V. Ljosa, C.  
857 Rueden, K. W. Eliceiri and A. E. Carpenter (2011). "Improved structure, function and  
858 compatibility for CellProfiler: modular high-throughput image analysis software."  
859 Bioinformatics **27**: 1179-1180.
- 860 Kayatekin, C., K. E. Matlack, W. R. Hesse, Y. Guan, S. Chakrabortee, J. Russ, E. E. Wanker,  
861 J. V. Shah and S. Lindquist (2014). "Prion-like proteins sequester and suppress the toxicity of  
862 huntingtin exon 1." Proc Natl Acad Sci USA **111**: 12085-12090.
- 863 Kopito, R. R. (2000). "Aggresomes, inclusion bodies and protein aggregation." Trends Cell  
864 Biol **10**: 524-530.
- 865 Leak, R. K. (2014). "Heat shock proteins in neurodegenerative disorders and aging." J Cell  
866 Commun Signal **8**: 293-310.
- 867 Leak, R. K., M. P. Frosch, T. G. Beach and G. M. Halliday (2019). "Alpha-synuclein: prion or  
868 prion-like?" Acta Neuropathol **138**: 509-514.
- 869 Lin, P.-Y., S. M. Simon, W. K. Koh, O. Folorunso, C. S. Umbaugh and A. Pierce (2013). "Heat  
870 shock factor 1 over-expression protects against exposure of hydrophobic residues on mutant

- 871 SOD1 and early mortality in a mouse model of amyotrophic lateral sclerosis." Mol  
872 Neurodegener **8**: 43-43.
- 873 Matsumoto, G., S. Kim and R. I. Morimoto (2006). "Huntingtin and mutant SOD1 form  
874 aggregate structures with distinct molecular properties in human cells." J Biol Chem **281**:  
875 4477-4485.
- 876 McAlary, L., J. A. Aquilina and J. J. Yerbury (2016). "Susceptibility of mutant SOD1 to form a  
877 destabilized monomer predicts cellular aggregation and toxicity but not in vitro aggregation  
878 propensity." Front Neurosci **10**: 499.
- 879 McAlary, L., S. S. Plotkin, J. J. Yerbury and N. R. Cashman (2019). "Prion-Like Propagation  
880 of Protein Misfolding and Aggregation in Amyotrophic Lateral Sclerosis." Front Mol Neurosci  
881 **12**: 262.
- 882 McQuin, C., A. Goodman, V. Chernyshev, L. Kametsky, B. A. Cimini, K. W. Karhohs, M.  
883 Doan, L. Ding, S. M. Rafelski, D. Thirstrup, W. Wiegraebe, S. Singh, T. Becker, J. C. Caicedo  
884 and A. E. Carpenter (2018). "CellProfiler 3.0: Next-generation image processing for biology."  
885 PLoS Biol **16**: e2005970.
- 886 Olzscha, H., S. M. Schermann, A. C. Woerner, S. Pinkert, M. H. Hecht, G. G. Tartaglia, M.  
887 Vendruscolo, M. Hayer-Hartl, F. U. Hartl and R. M. Vabulas (2011). "Amyloid-like aggregates  
888 sequester numerous metastable proteins with essential cellular functions." Cell **144**: 67-78.
- 889 Pelham, H. R. (1982). "A regulatory upstream promoter element in the Drosophila Hsp 70  
890 heat-shock gene." Cell **30**: 517-528.
- 891 Polling, S., Y. F. Mok, Y. M. Ramdzan, B. J. Turner, J. J. Yerbury, A. F. Hill and D. M. Hatters  
892 (2014). "Misfolded polyglutamine, polyalanine, and superoxide dismutase 1 aggregate via  
893 distinct pathways in the cell." J Biol Chem **289**: 6669-6680.
- 894 Roberts, K., R. Zeineddine, L. Corcoran, W. Li, I. L. Campbell and J. J. Yerbury (2013).  
895 "Extracellular aggregated Cu/Zn superoxide dismutase activates microglia to give a cytotoxic  
896 phenotype." Glia **61**: 409-419.
- 897 San Gil, R., L. Ooi, J. J. Yerbury and H. Ecroyd (2017). "The heat shock response in neurons  
898 and astroglia and its role in neurodegenerative diseases." Mol Neurodegener **12**: 65.
- 899 Scheckel, C. and A. Aguzzi (2018). "Prions, prionoids and protein misfolding disorders." Nat  
900 Rev Genet **19**: 405-418.
- 901 Scherzinger, E., R. Lurz, M. Turmaine, L. Mangiarini, B. Hollenbach, R. Hasenbank, G. P.  
902 Bates, S. W. Davies, H. Lehrach and E. E. Wanker (1997). "Huntingtin-encoded polyglutamine  
903 expansions form amyloid-like protein aggregates in vitro and in vivo." Cell **90**: 549-558.
- 904 Sorger, P., M. Lewis and H. Pelham (1987). "Heat shock factor is regulated differently in yeast  
905 and HeLa cells." Nature **329**: 81 - 84.
- 906 Vaquer-Alicea, J. and M. I. Diamond (2019). "Propagation of Protein Aggregation in  
907 Neurodegenerative Diseases." Annu Rev Biochem **88**: 785-810.
- 908 Victoria, G. S. and C. Zurzolo (2017). "The spread of prion-like proteins by lysosomes and  
909 tunneling nanotubes: Implications for neurodegenerative diseases." J Cell Biol **216**: 2633-  
910 2644.

- 911 Wang, P., C. M. Wander, C. X. Yuan, M. S. Bereman and T. J. Cohen (2017). "Acetylation-  
912 induced TDP-43 pathology is suppressed by an HSF1-dependent chaperone program." Nat  
913 Commun **8**: 82.
- 914 Watanabe, M., M. Dykes-Hoberg, V. Cizewski Culotta, D. L. Price, P. C. Wong and J. D.  
915 Rothstein (2001). "Histological evidence of protein aggregation in mutant SOD1 transgenic  
916 mice and in amyotrophic lateral sclerosis neural tissues." Neurobiol Dis **8**: 933-941.
- 917 Webster, J. M., A. L. Darling, V. N. Uversky and L. J. Blair (2019). "Small heat Shock proteins,  
918 big impact on protein aggregation in neurodegenerative disease." Front Pharmacol **10**: 1047.
- 919 Westerheide, S. D., J. D. Bosman, B. N. A. Mbadugha, T. L. A. Kawahara, G. Matsumoto, S.  
920 Kim, W. Gu, J. P. Devlin, R. B. Silverman and R. I. Morimoto (2004). "Celastrols as inducers  
921 of the heat shock response and cytoprotection." J Biol Chem **279**: 56053-56060.
- 922 Whiten, D. R., R. San Gil, L. McAlary, J. J. Yerbury, H. Ecroyd and M. R. Wilson (2016). "Rapid  
923 flow cytometric measurement of protein inclusions and nuclear trafficking." Sci Rep **6**: 31138.
- 924 Wu, D., J. J. Vonk, F. Salles, D. Vonk, M. Haslbeck, R. Melki, S. Bergink and H. H. Kampinga  
925 (2019). "The N terminus of the small heat shock protein HSPB7 drives its polyQ aggregation-  
926 suppressing activity." J Biol Chem **294**: 9985-9994.
- 927 Xiao, H. and J. Lis (1988). "Germline transformation used to define key features of heat-shock  
928 response elements." Science **239**: 1139-1142.
- 929 Yerbury, J. J., L. Ooi, I. P. Blair, P. Ciryam, C. M. Dobson and M. Vendruscolo (2019). "The  
930 metastability of the proteome of spinal motor neurons underlies their selective vulnerability in  
931 ALS." Neurosci Lett **704**: 89-94.
- 932 Yerbury, J. J., L. Ooi, A. Dillin, D. N. Saunders, D. M. Hatters, P. M. Beart, N. R. Cashman,  
933 M. R. Wilson and H. Ecroyd (2016). "Walking the tightrope: Proteostasis and  
934 neurodegenerative disease." J Neurochem **137**: 489-505.
- 935 Zeineddine, R., J. F. Pundavela, L. Corcoran, E. M. Stewart, D. Do-Ha, M. Bax, G. Guillemin,  
936 K. L. Vine, D. M. Hatters, H. Ecroyd, C. M. Dobson, B. J. Turner, L. Ooi, M. R. Wilson, N. R.  
937 Cashman and J. J. Yerbury (2015). "SOD1 protein aggregates stimulate macropinocytosis in  
938 neurons to facilitate their propagation." Mol Neurodegener **10**: 57.
- 939 Zeineddine, R. and J. J. Yerbury (2015). "The role of macropinocytosis in the propagation of  
940 protein aggregation associated with neurodegenerative diseases." Front Physiol **6**: 277.  
941
